# Supplementary material for: The key role of atmospheric absorption in the Asian summer monsoon response to dust emissions in CMIP6 models
Source: Copernicus journal article supplement (doi:10.5194/acp-24-13385-2024), 2024-12-05
Supplement: Supplementary file 1 [file acp-24-13385-2024-supplement.pdf]

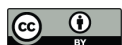

*Supplement of*

## **The key role of atmospheric absorption in the Asian summer monsoon response to dust emissions in CMIP6 models**

**Alcide Zhao et al.**

*Correspondence to:* Claire L. Ryder ([c.l.ryder@reading.ac.uk](mailto:c.l.ryder@reading.ac.uk))

The copyright of individual parts of the supplement might differ from the article licence.

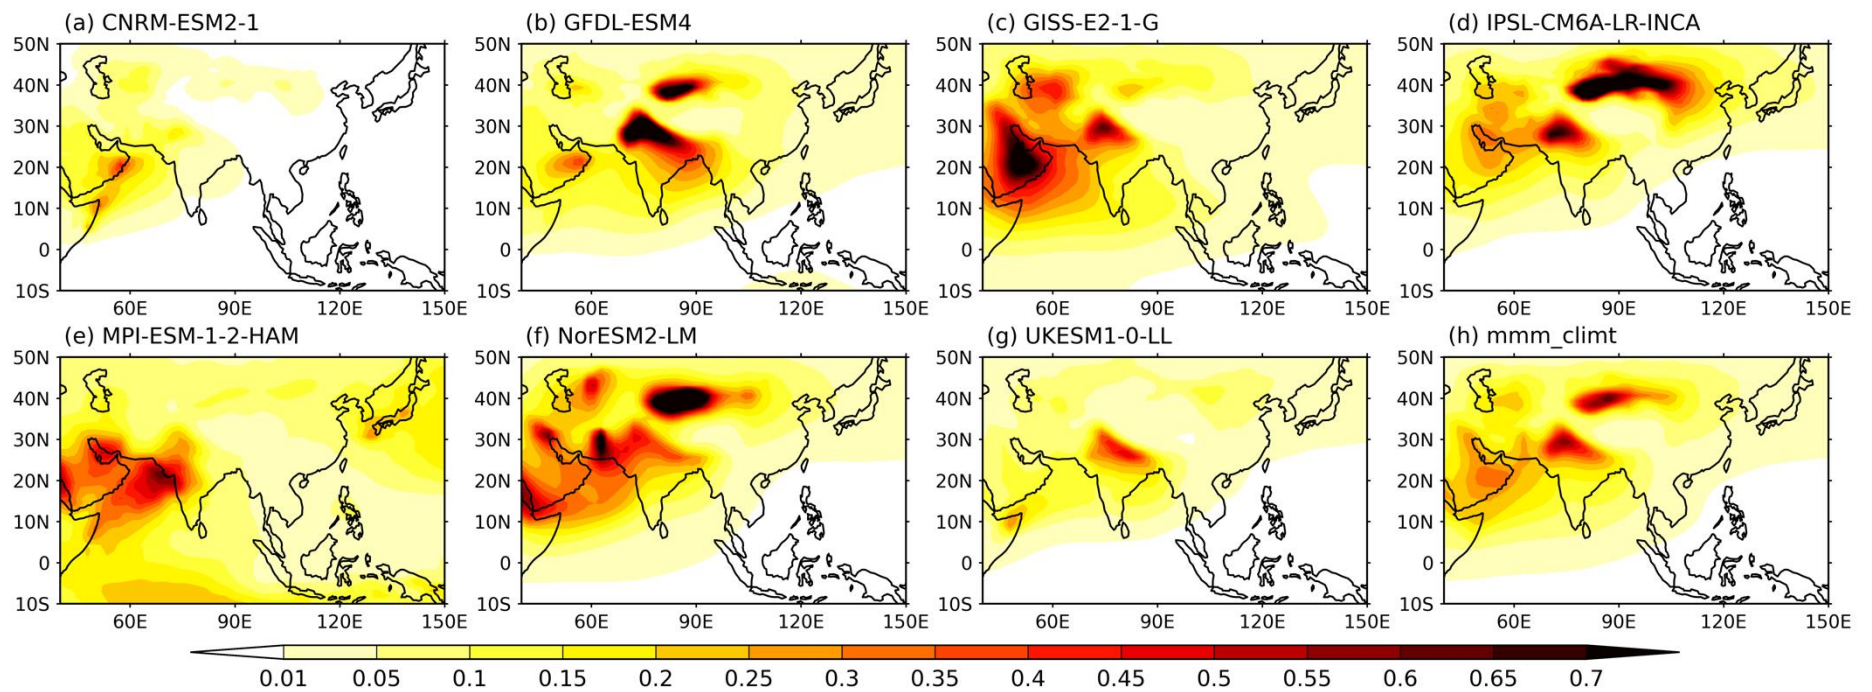

**Figure S1.** Models' simulated JJA climatology of dust aerosol optical depth (DOD) from the piClim-control.

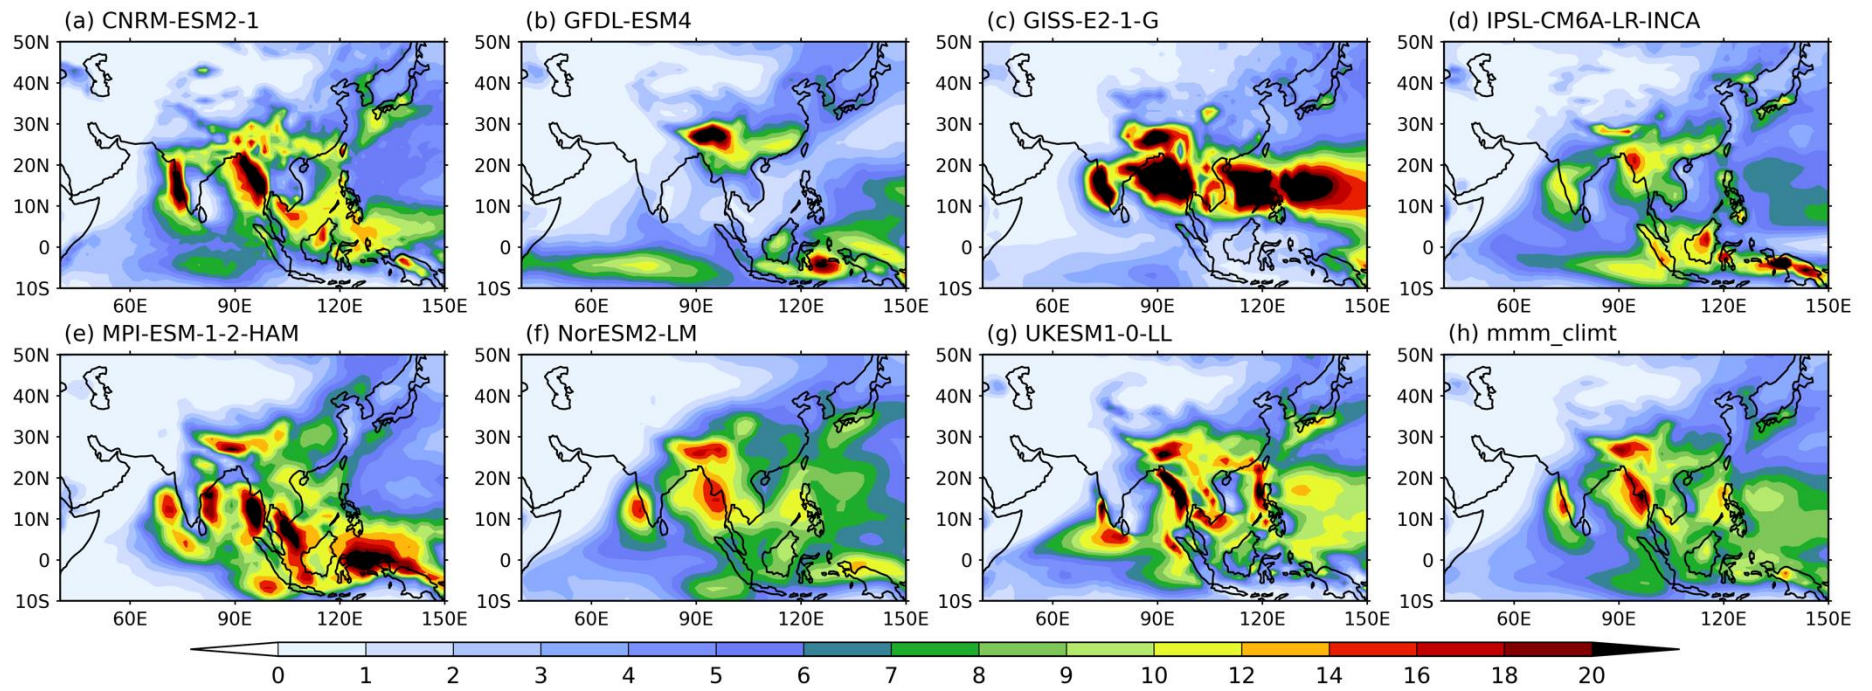

**Figure S2.** Models' simulated JJA climatology of precipitation (mm day<sup>-1</sup>) derived from the piClim-control.

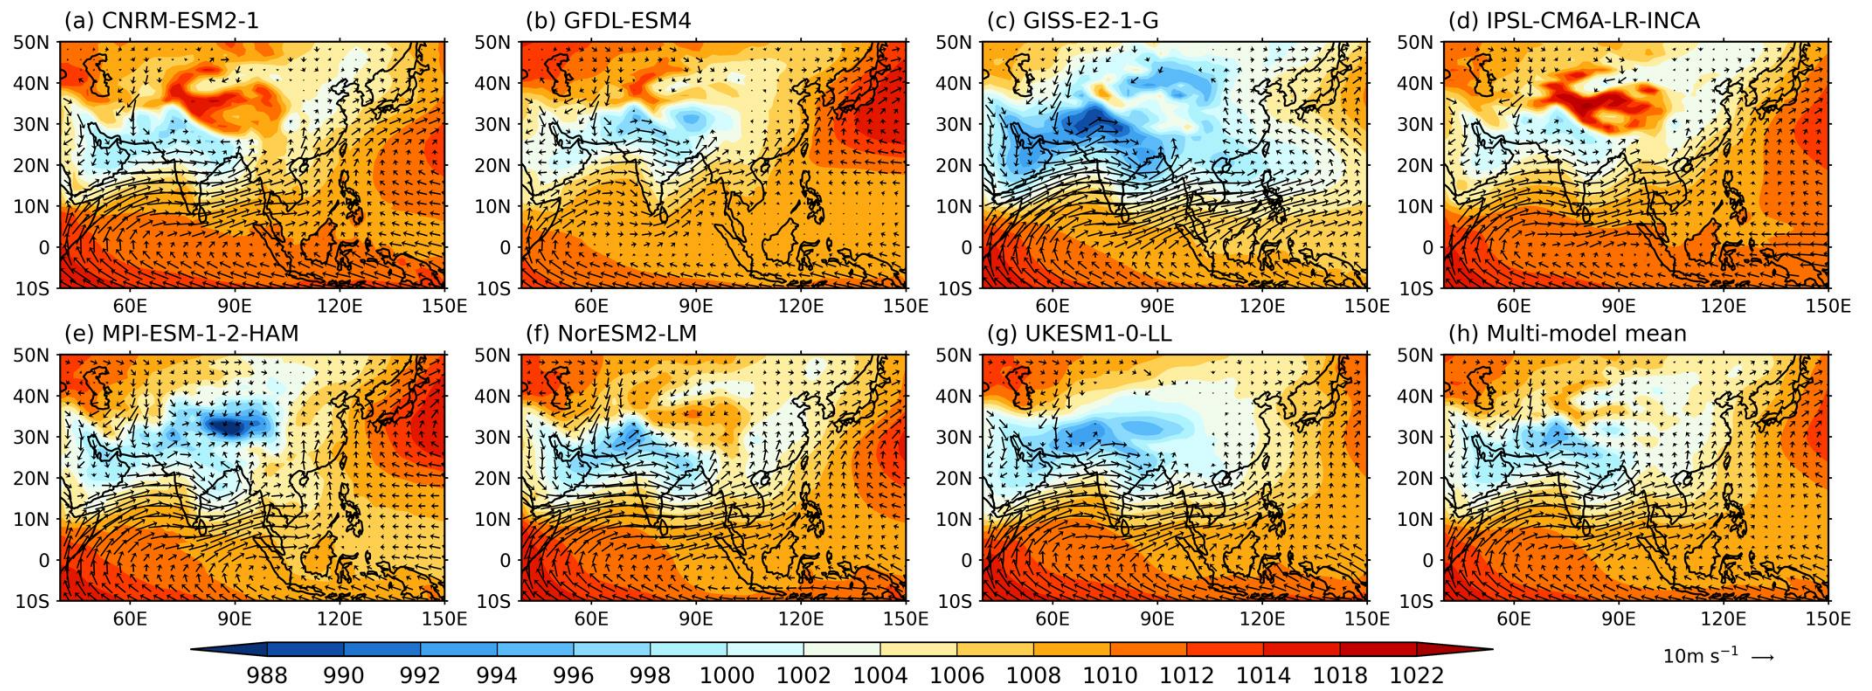

**Figure S3.** Models' simulated JJA climatology of sea level pressure (colours, hPa) and 850-hPa winds (vectors,  $\text{m s}^{-1}$ ) derived from the piClim-control.

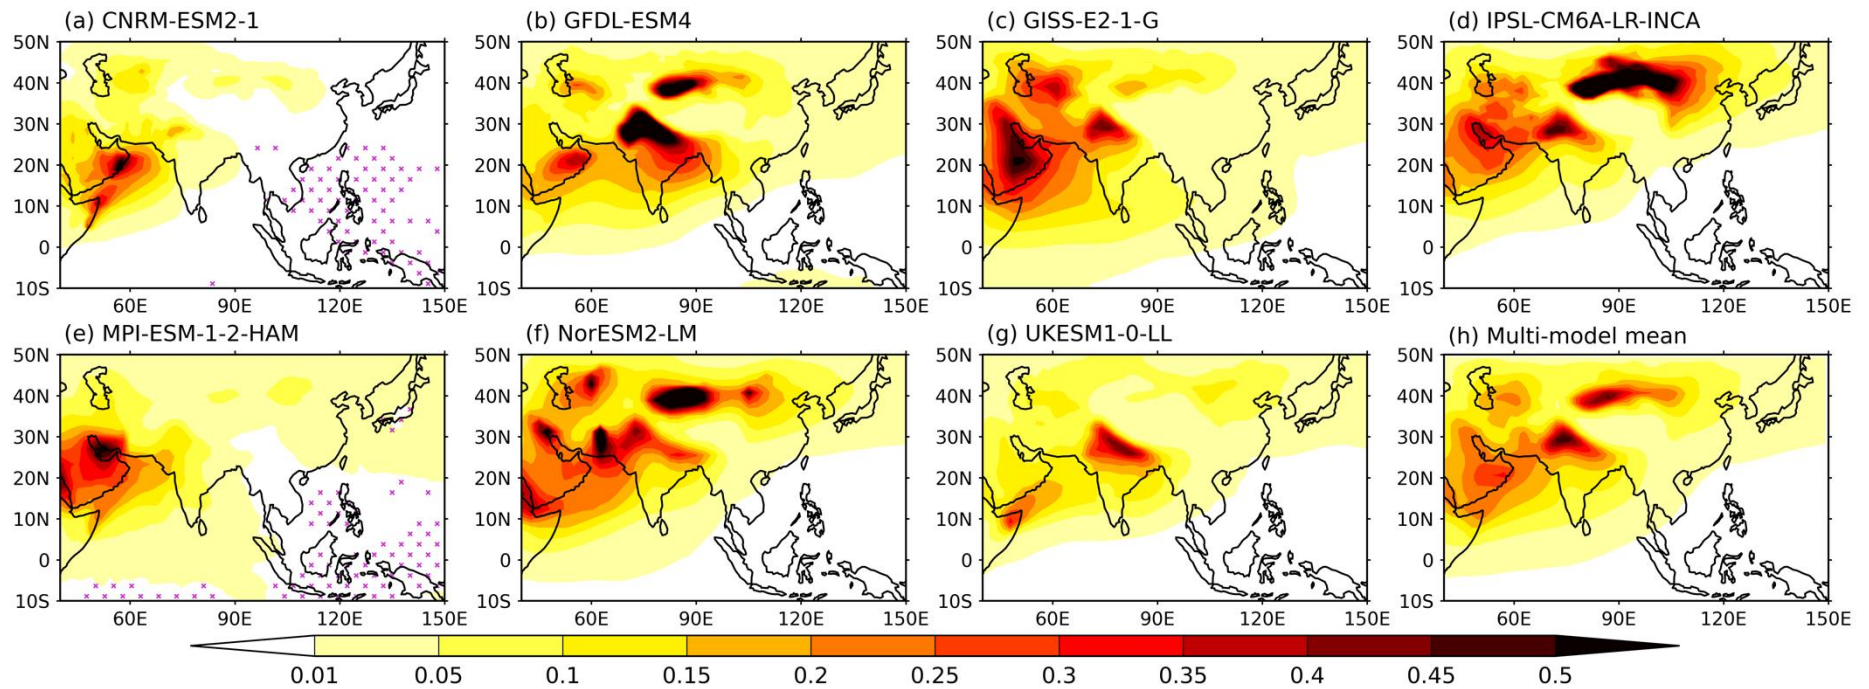

**Figure S4.** JJA mean changes in dust aerosol optical depth (DOD) due to doubled dust emissions in (a-g) individual models and (h) the multi-model mean. Purple hatches denote insignificant differences at the 10% level. Green hatches in (h) denote where  $\leq 4$  models have the same sign as the multi-model mean.

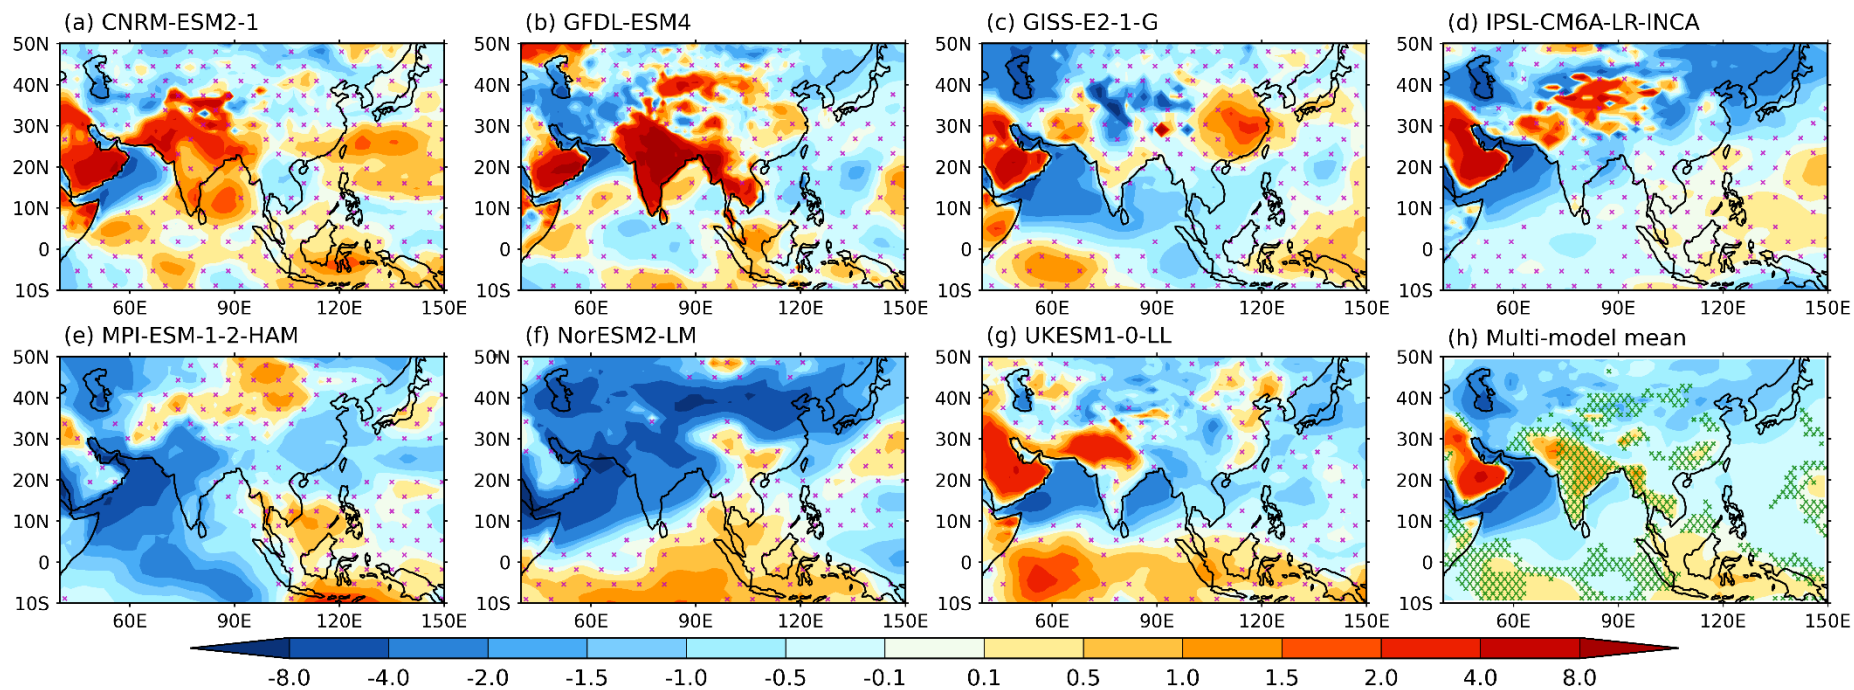

**Figure S5.** JJA mean changes in TOA clear-sky ERF ( $W m^{-2}$ ) due to doubled dust emissions in (a-g) individual models and (h) the multi-model mean. Purple hatches denote insignificant differences at the 10% level. Green hatches in (h) denote where  $\leq 4$  models have the same sign as the multi-model mean.

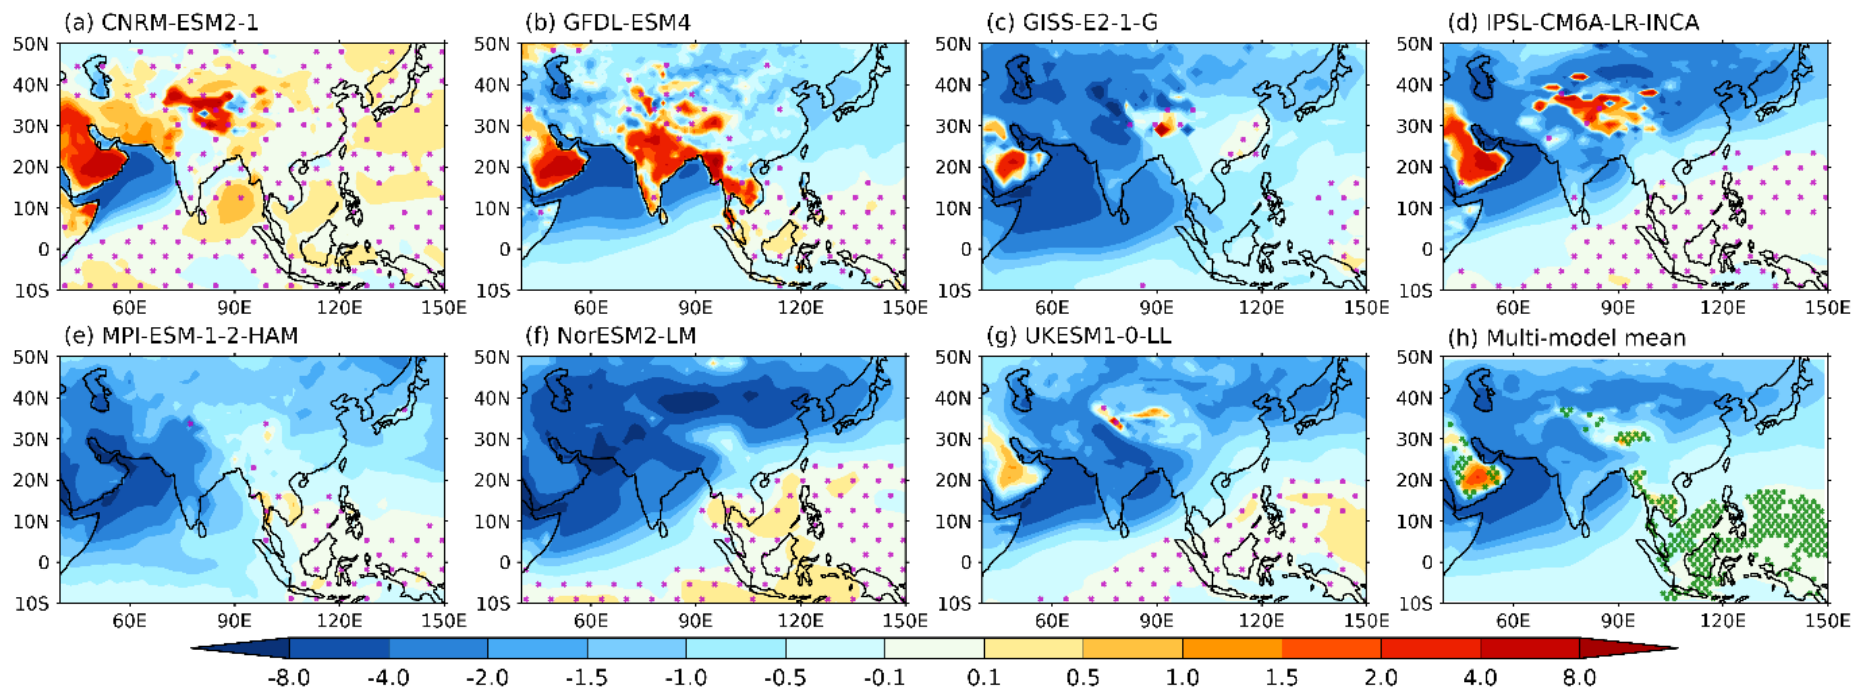

**Figure S6.** JJA mean changes in TOA clear-sky SW ERF ( $\text{W m}^{-2}$ ) due to doubled dust emissions in (a-g) individual models and (h) the multi-model mean. Purple hatches denote insignificant differences at the 10% level. Green hatches in (h) denote where  $\leq 4$  models have the same sign as the multi-model mean.

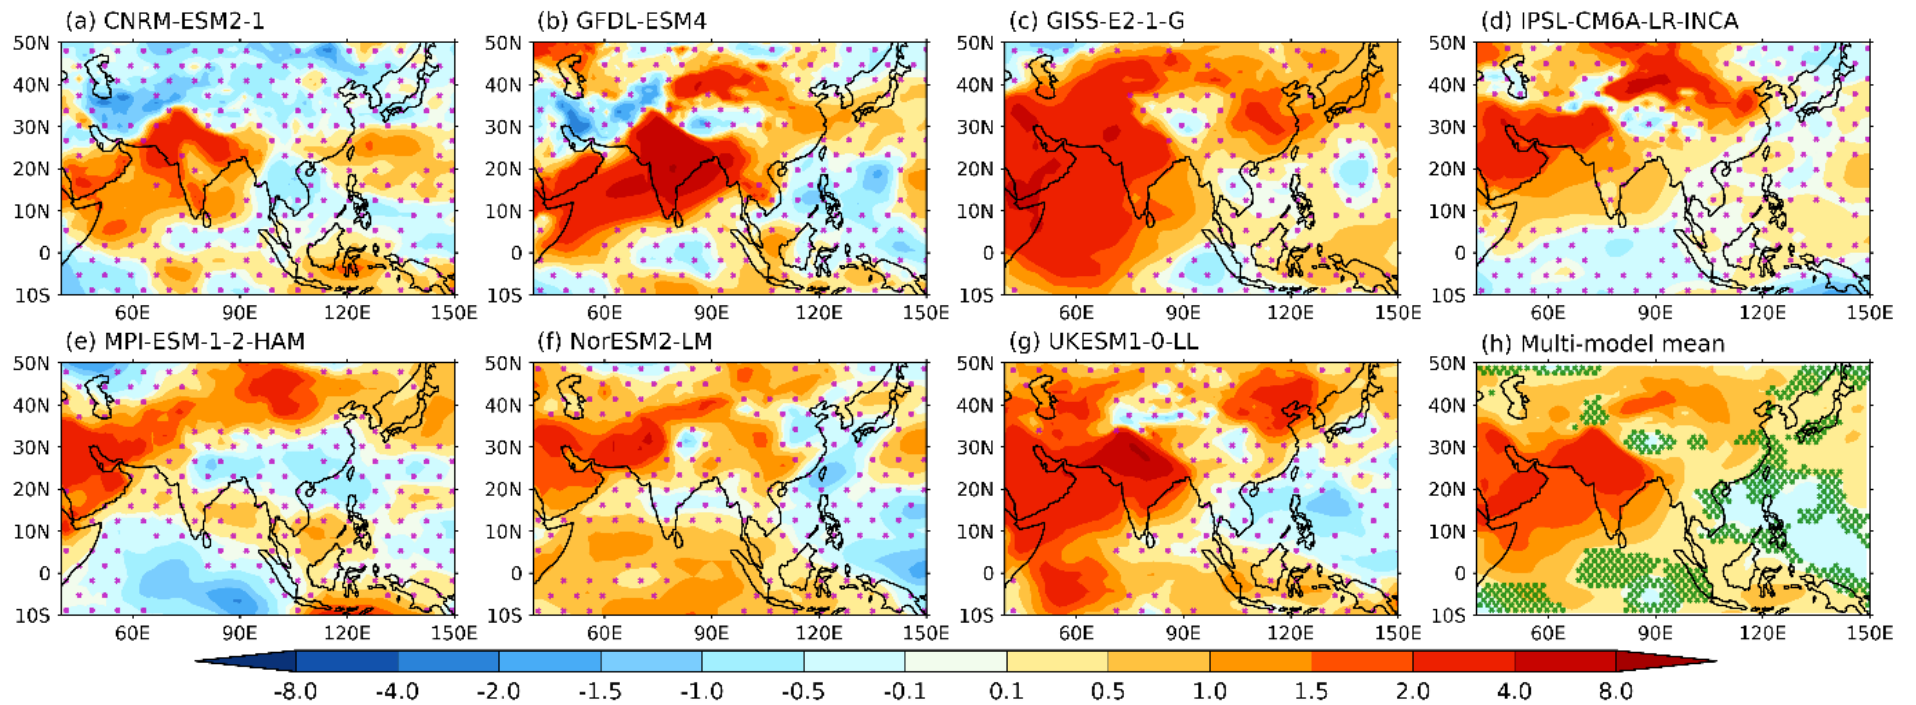

**Figure S7.** JJA mean changes in TOA clear-sky LW ERF ( $\text{W m}^{-2}$ ) due to doubled dust emissions in (a-g) individual models and (h) the multi-model mean. Purple hatches denote insignificant differences at the 10% level. Green hatches in (h) denote where  $\leq 4$  models have the same sign as the multi-model mean.



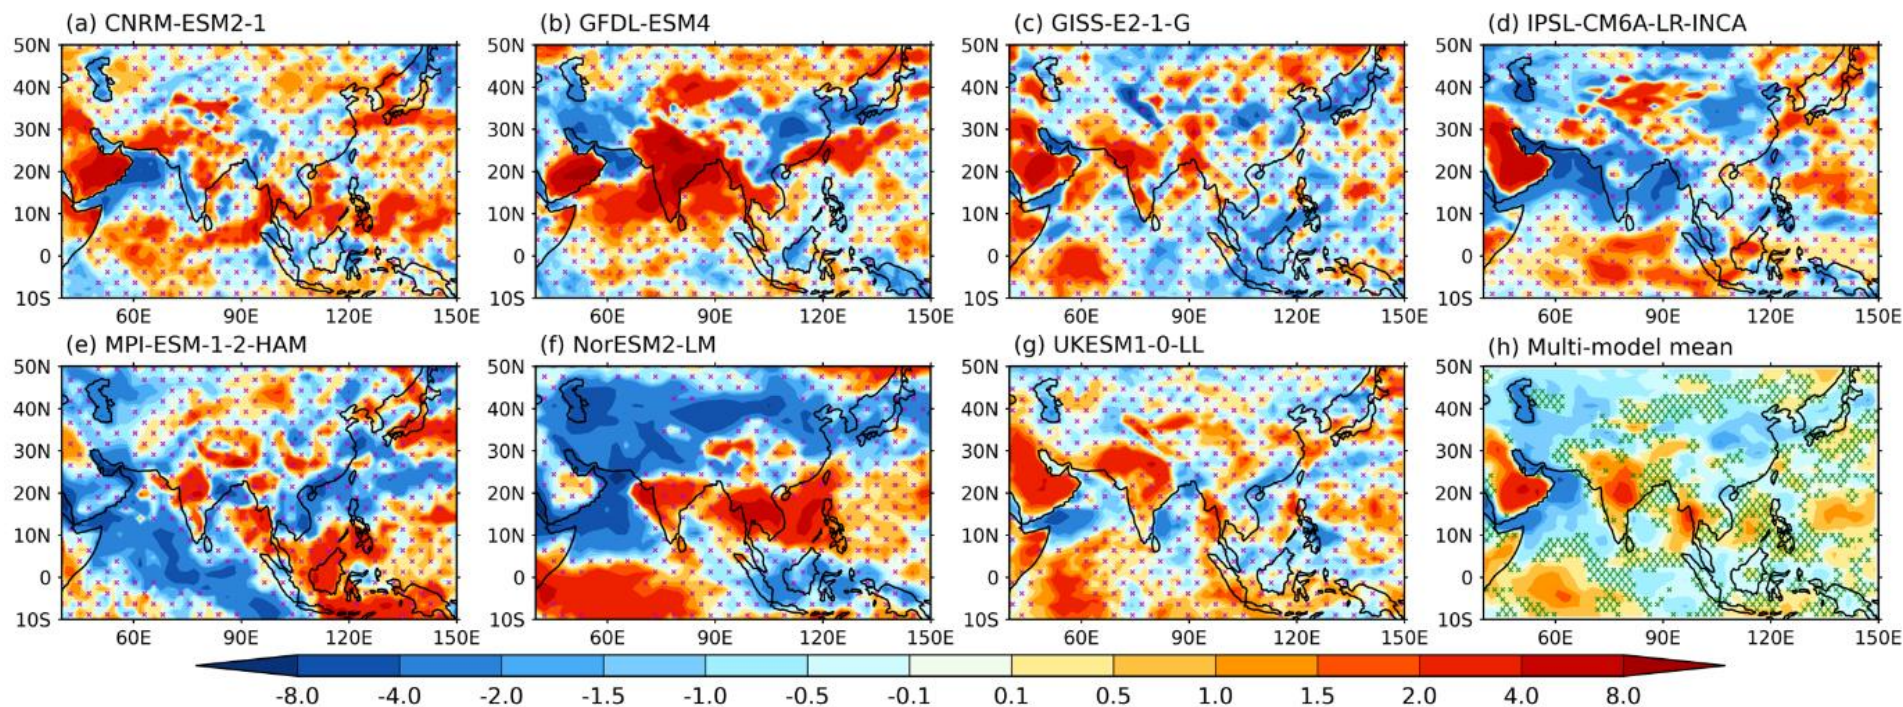

**Figure S8.** JJA mean changes in TOA all-sky net ERF ( $\text{W m}^{-2}$ ) due to doubled dust emissions in (a-g) individual models and (h) the multi-model mean. Purple hatches denote insignificant differences at the 10% level. Green hatches in (h) denote where  $\leq 4$  models have the same sign as the multi-model mean.

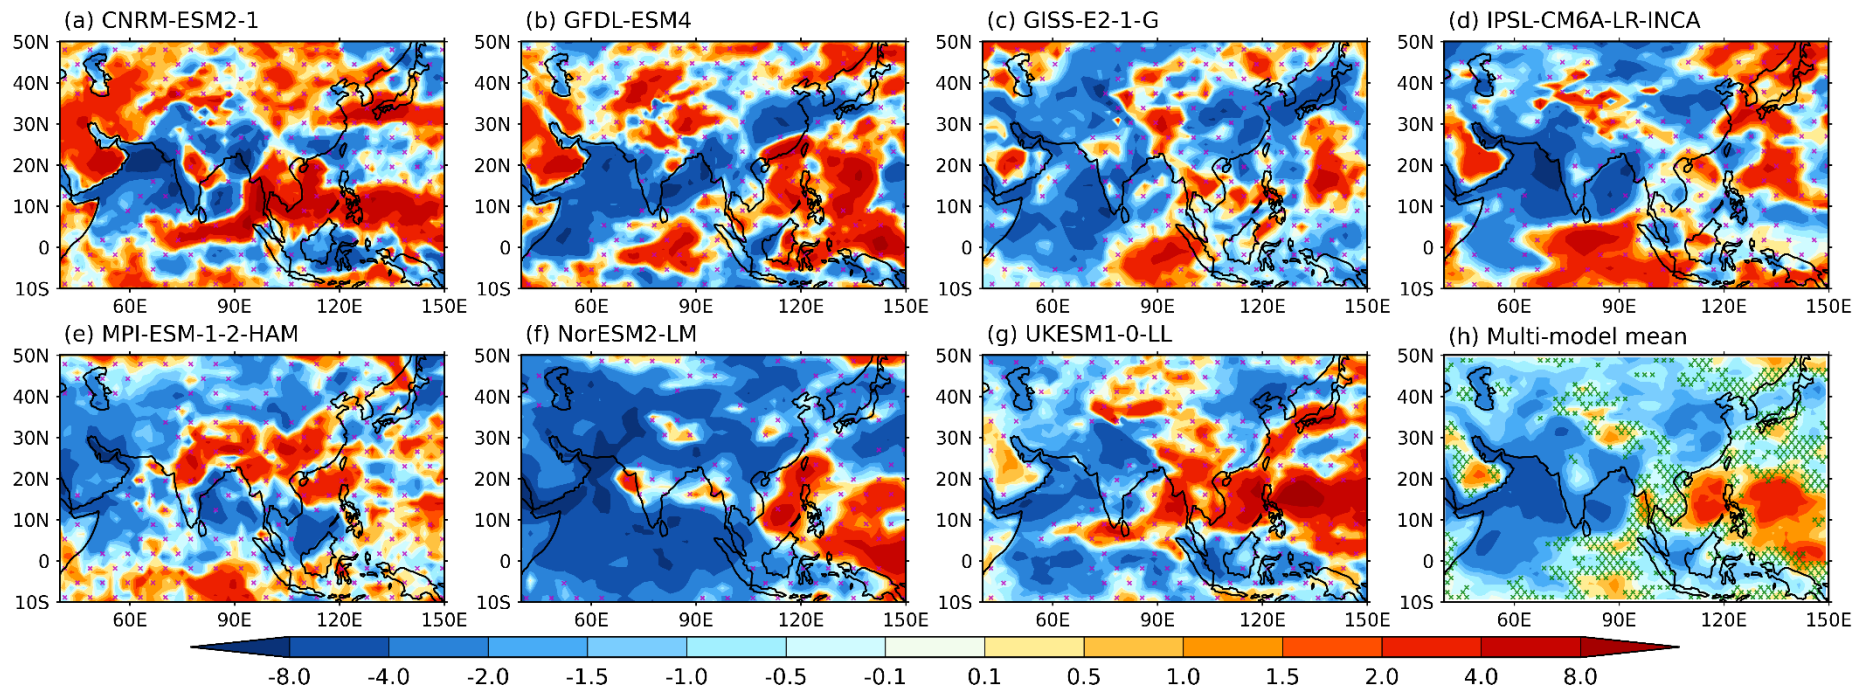

**Figure S9:** JJA mean TOA all-sky SW ERF ( $\text{W m}^{-2}$ ) due to doubled dust emissions in (a-g) individual models and (h) the multi-model mean. Purple hatches denote insignificant differences at the 10% level. Green hatches in (h) denote where  $\leq 4$  models have the same sign as the multi-model mean.

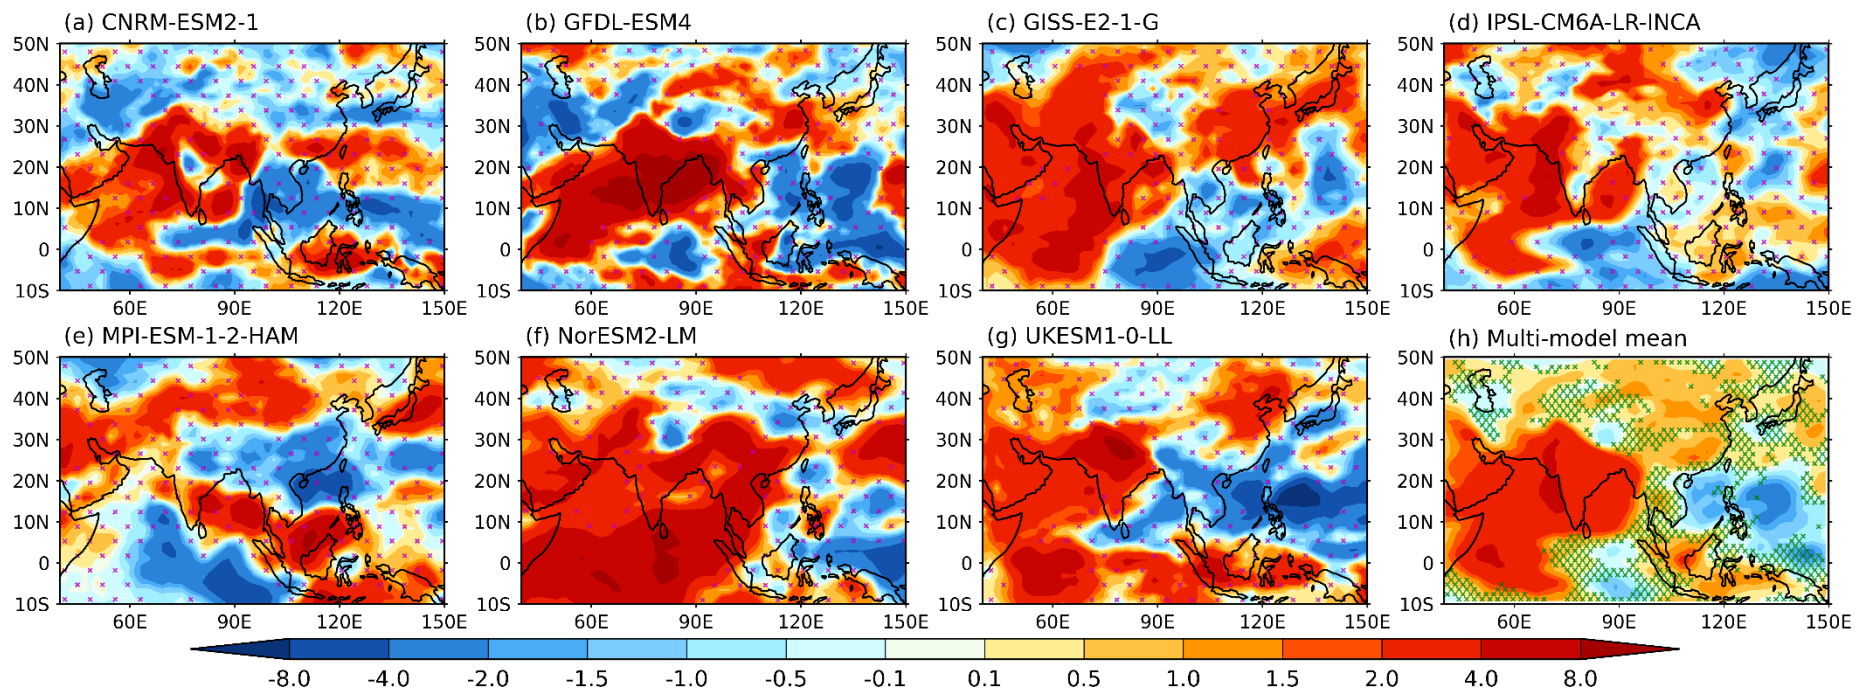

**Figure S10:** JJA mean TOA all-sky LW ERF ( $W m^{-2}$ ) due to doubled dust emissions in (a-g) individual models and (h) the multi-model mean. Purple hatches denote insignificant differences at the 10% level. Green hatches in (h) denote where  $\leq 4$  models have the same sign as the multi-model mean.

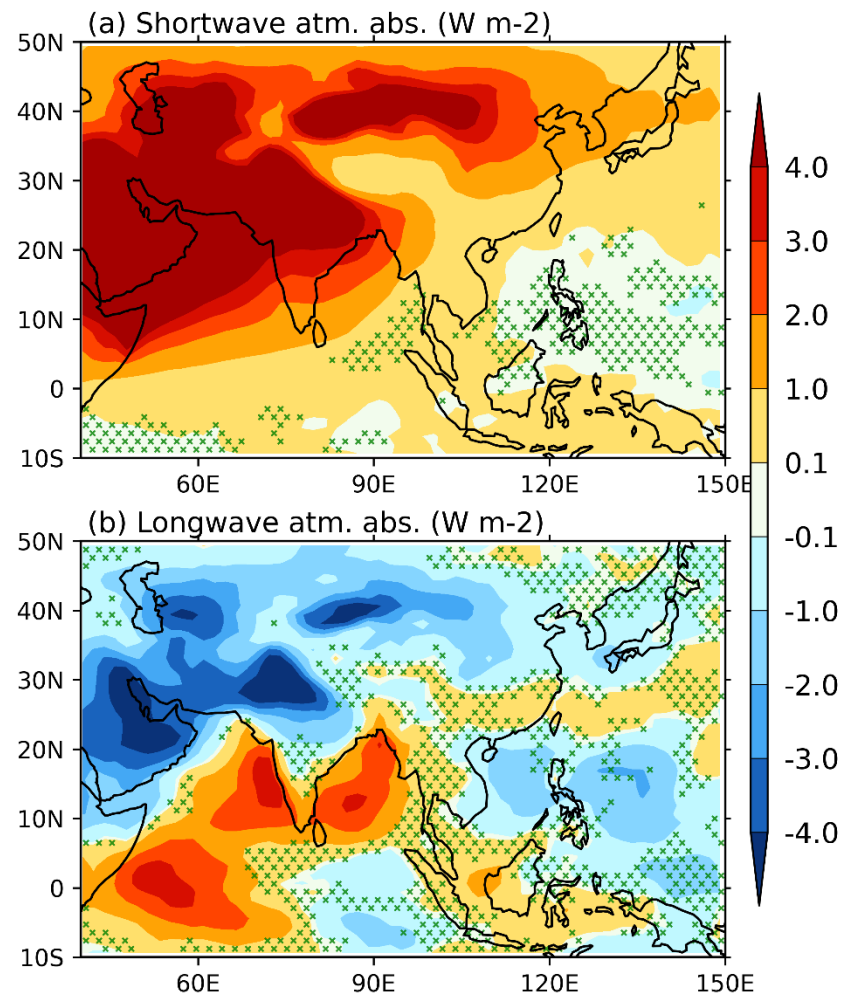

**Figure S11.** JJA multi-model mean changes in all-sky (a) shortwave and (b) longwave atmospheric absorption ( $W m^{-2}$ ) due to doubled dust emissions. Green hatches denote where  $\leq 4$  models have the same sign as the multi-model mean.

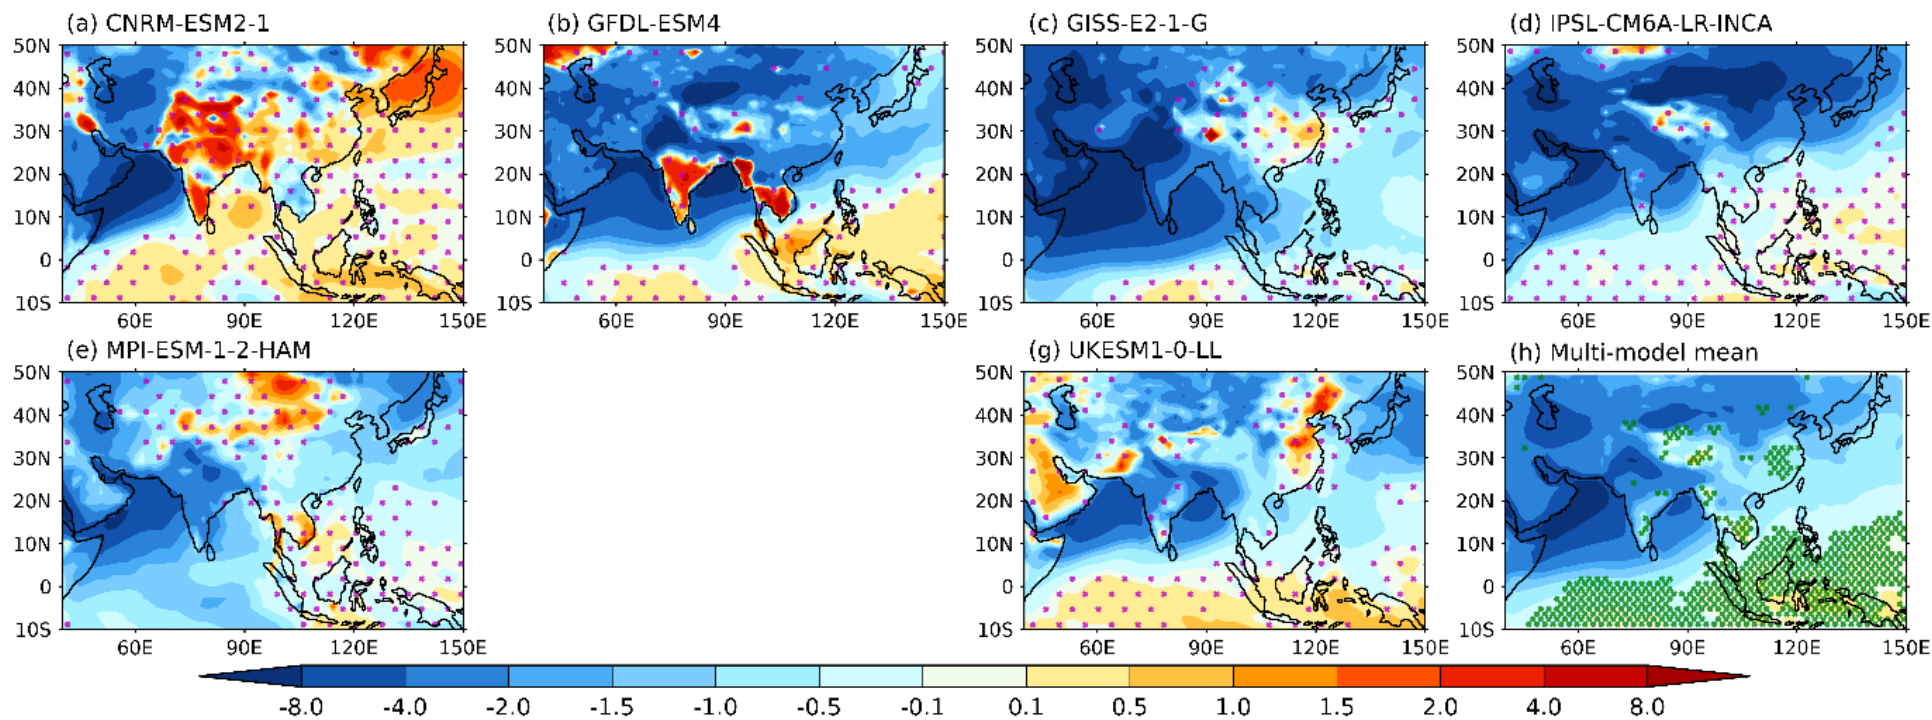

**Figure S12.** JJA mean changes in surface clear-sky net ERF ( $W m^{-2}$ ) due to doubled dust emissions in (a-g) individual models and (h) the multi-model mean. Purple hatches denote insignificant differences at the 10% level. Green hatches in (h) denote where  $\leq 4$  models have the same sign as the multi-model mean. Data not available for all models.

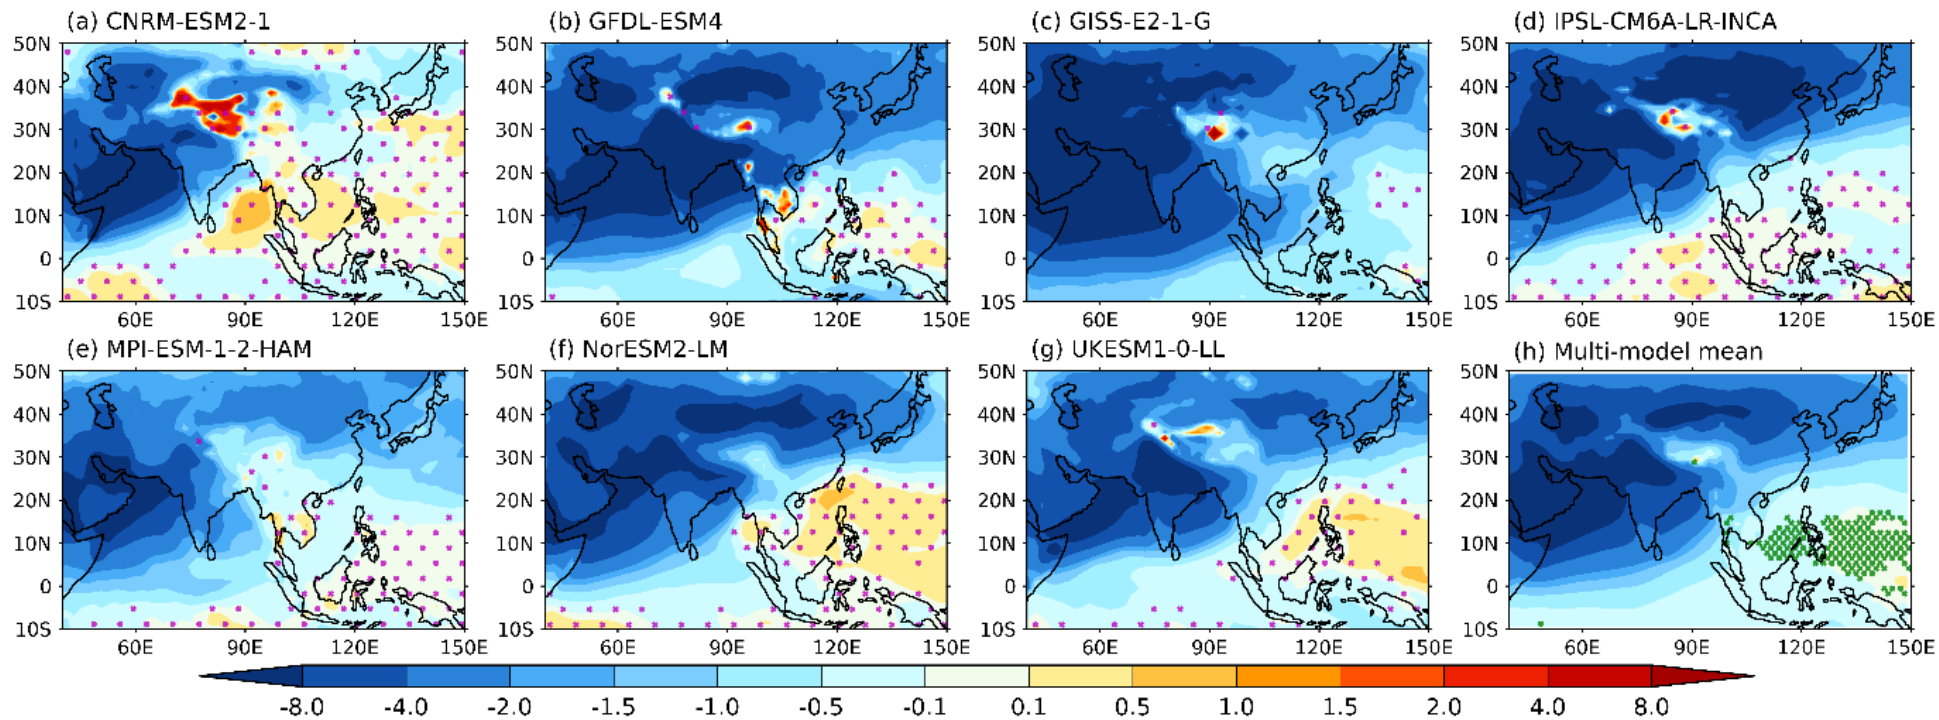

**Figure S13.** JJA mean changes in surface clear-sky SW ERF ( $W m^{-2}$ ) due to doubled dust emissions in (a-g) individual models and (h) the multi-model mean. Purple hatches denote insignificant differences at the 10% level. Green hatches in (h) denote where  $\leq 4$  models have the same sign as the multi-model mean.

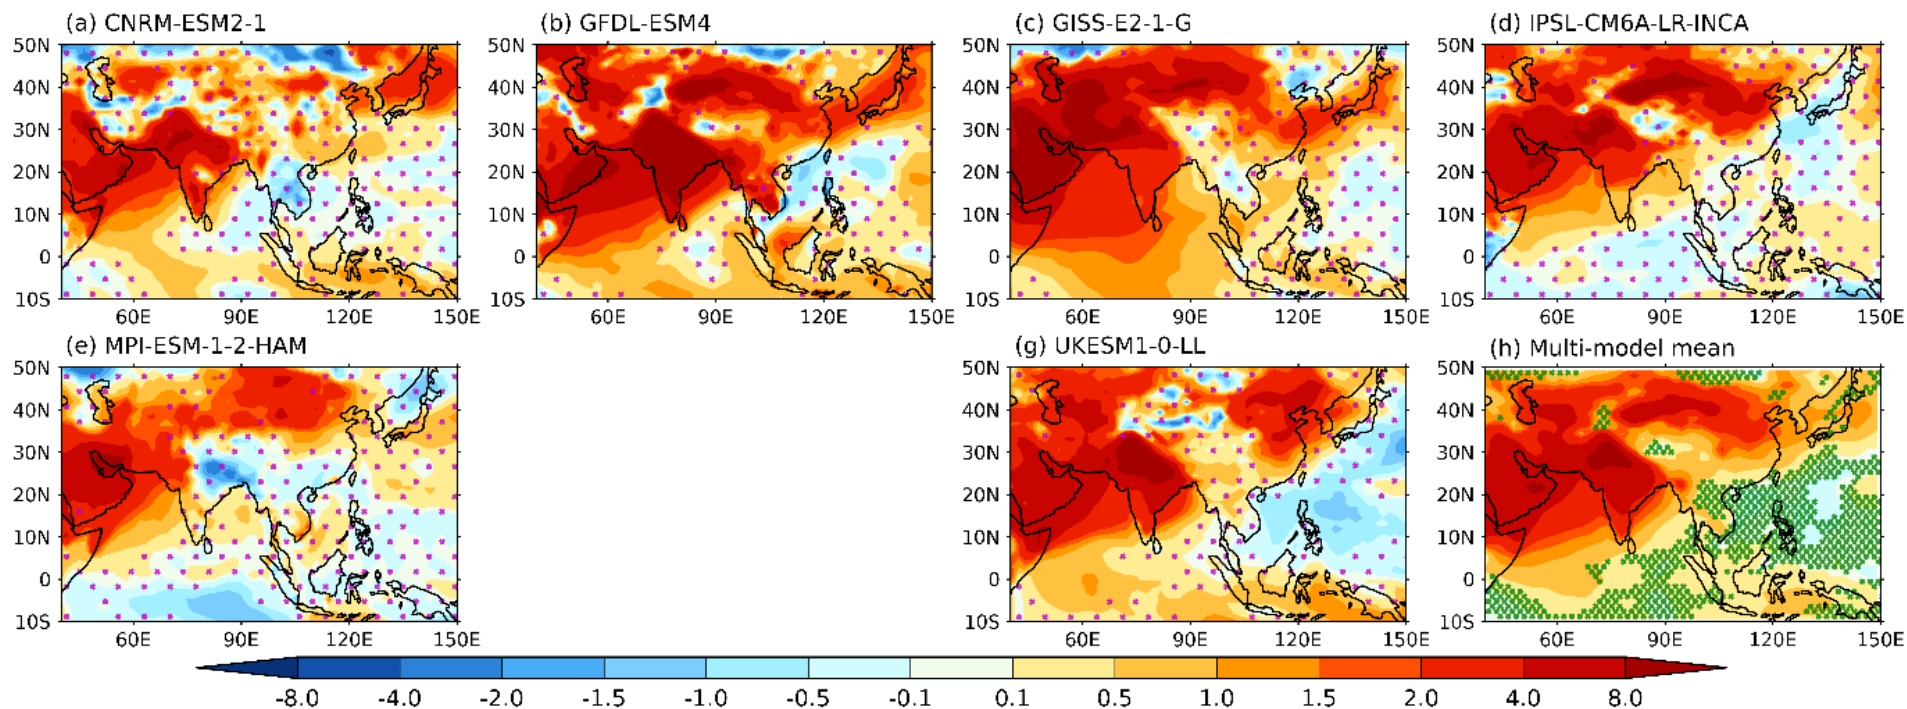

**Figure S14.** JJA mean changes in surface clear-sky LW ERF ( $W m^{-2}$ ) due to doubled dust emissions in (a-g) individual models and (h) the multi-model mean. Purple hatches denote insignificant differences at the 10% level. Green hatches in (h) denote where  $\leq 4$  models have the same sign as the multi-model mean. Data not available for all models.

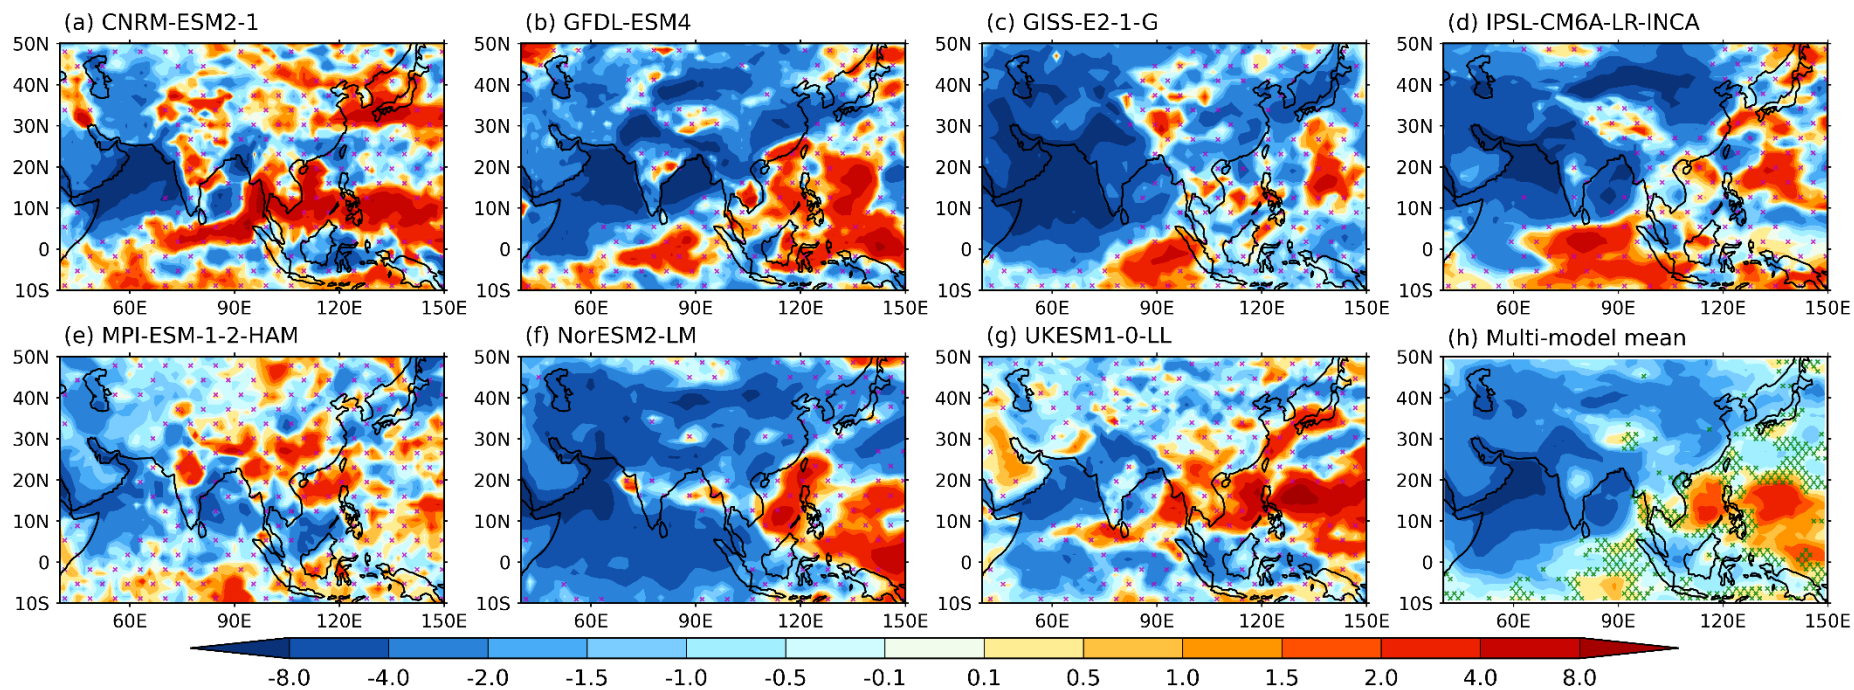

**Figure S15.** JJA mean changes in surface all-sky net ERF ( $W m^{-2}$ ) due to doubled dust emissions in (a-g) individual models and (h) the multi-model mean. Purple hatches denote insignificant differences at the 10% level. Green hatches in (h) denote where  $\leq 4$  models have the same sign as the multi-model mean.



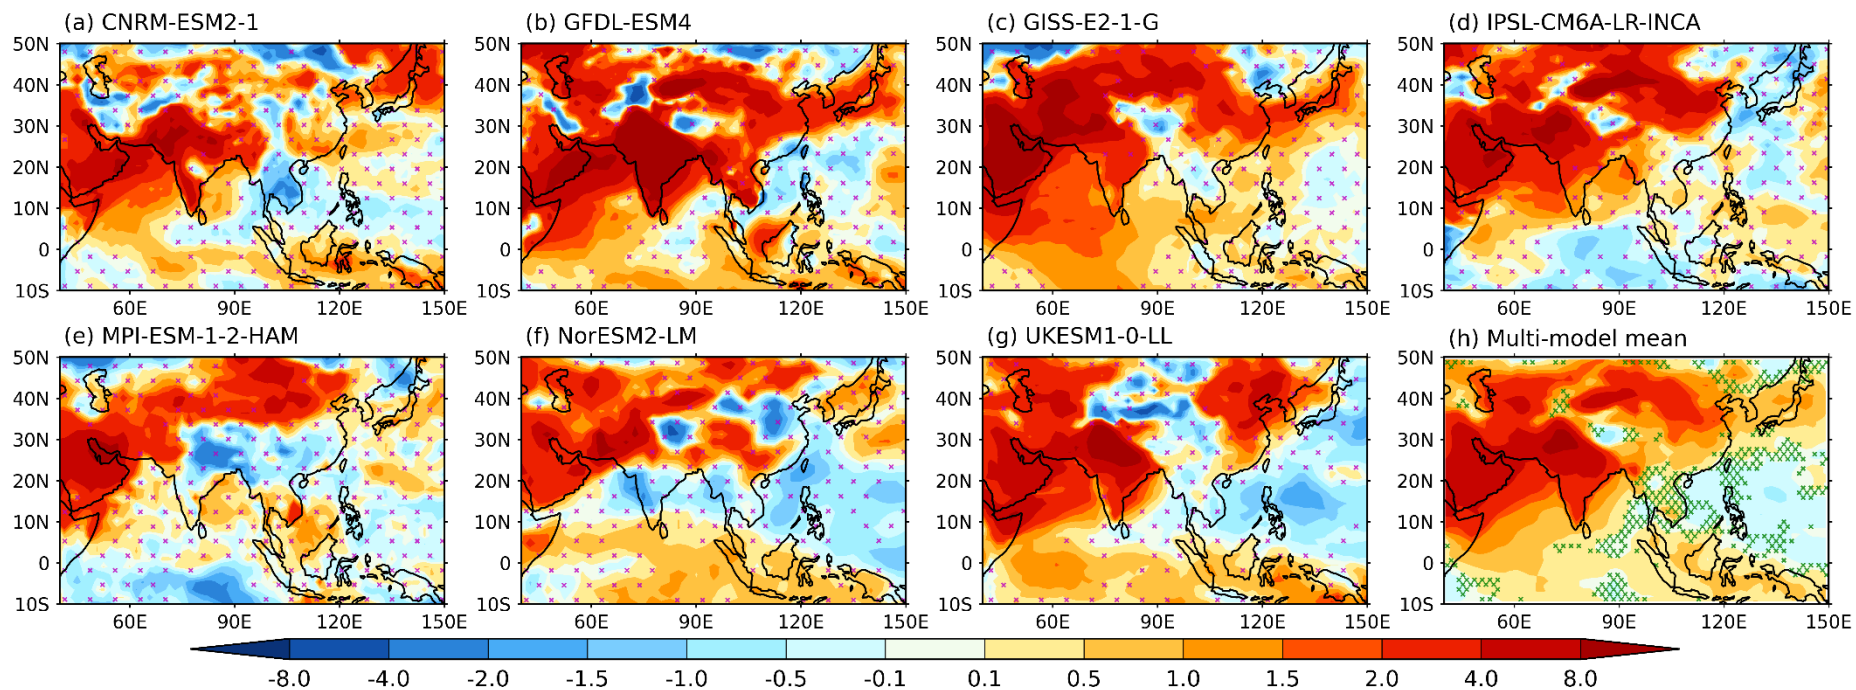

**Figure S16:** JJA mean surface all-sky SW ERF ( $W m^{-2}$ ) due to doubled dust emissions in (a-g) individual models and (h) the multi-model mean. Purple hatches denote insignificant differences at the 10% level. Green hatches in (h) denote where  $\leq 4$  models have the same sign as the multi-model mean.

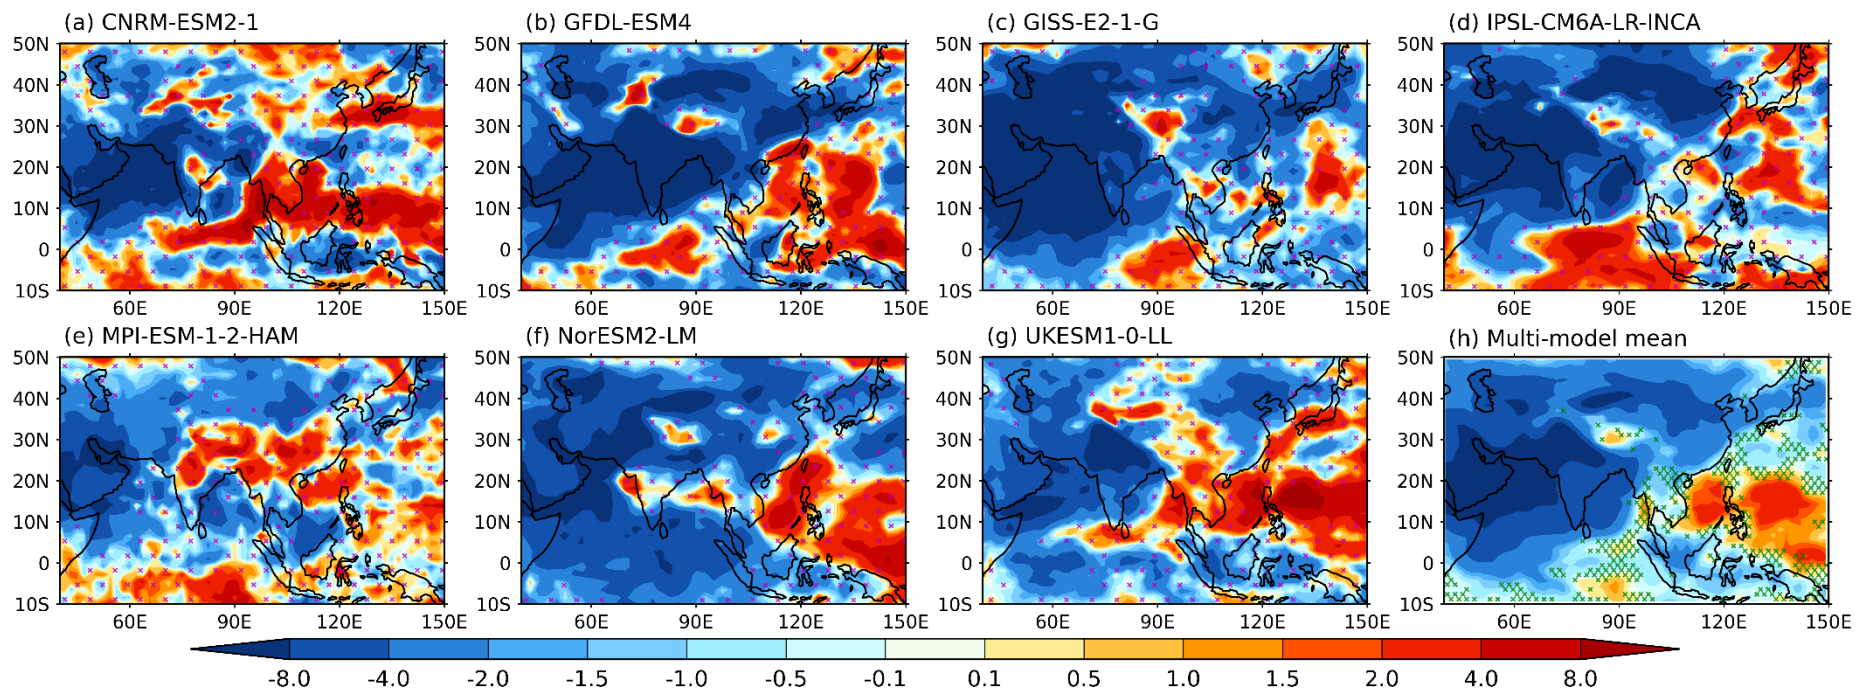

**Figure S17:** JJA mean surface all-sky LW ERF ( $W m^{-2}$ ) due to doubled dust emissions in (a-g) individual models and (h) the multi-model mean. Purple hatches denote insignificant differences at the 10% level. Green hatches in (h) denote where  $\leq 4$  models have the same sign as the multi-model mean.

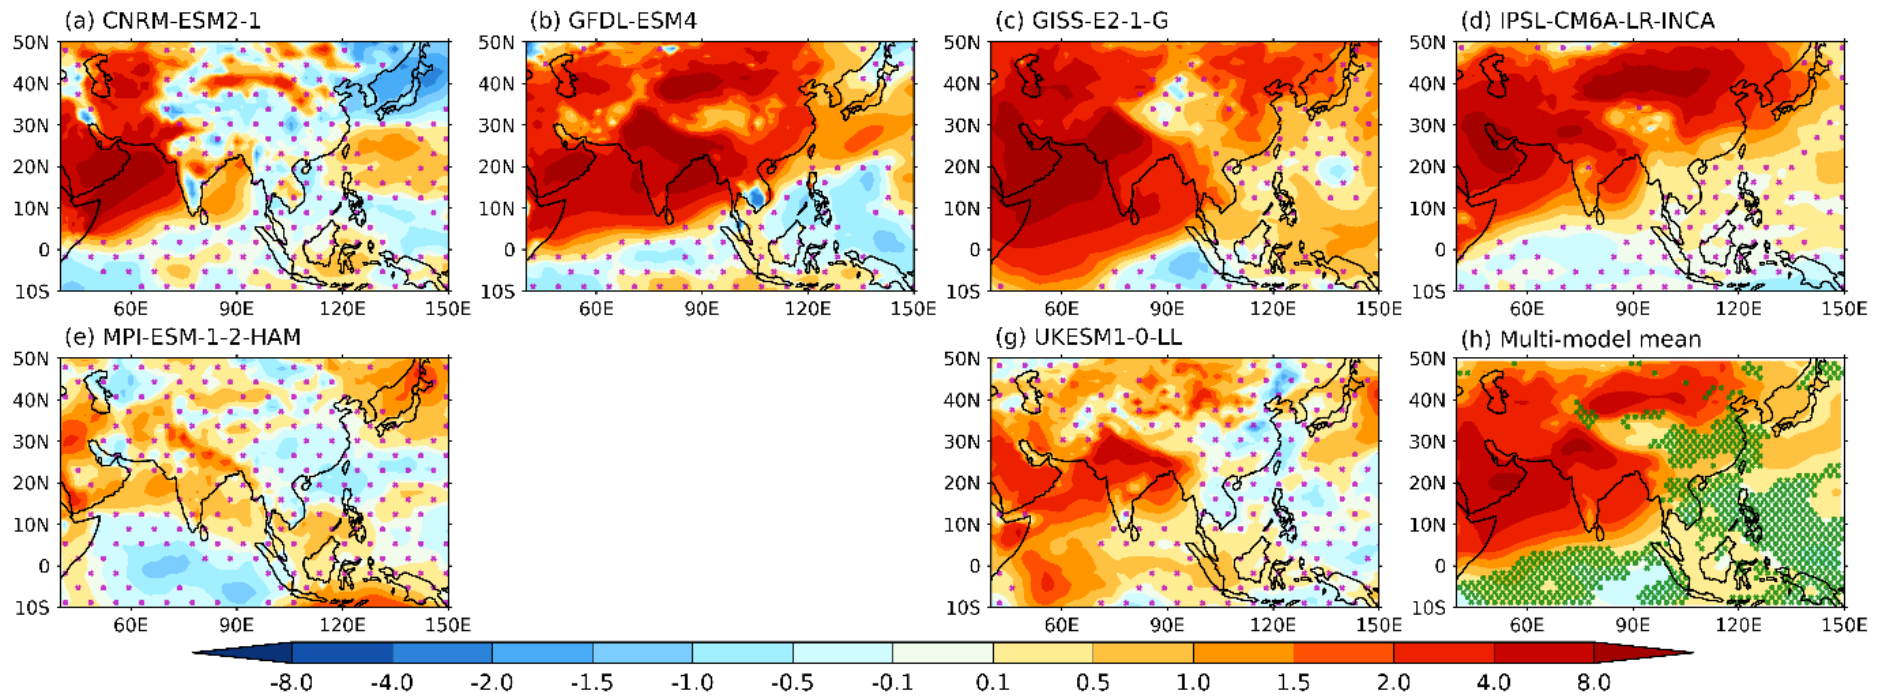

**Figure S18** JJA mean changes in total clear-sky atmospheric absorption ( $W m^{-2}$ ) due to doubled dust emissions in (a-g) individual models and (h) the multi-model mean. Purple hatches denote insignificant differences at the 10% level. Green hatches in (h) denote where  $\leq 4$  models have the same sign as the multi-model mean.

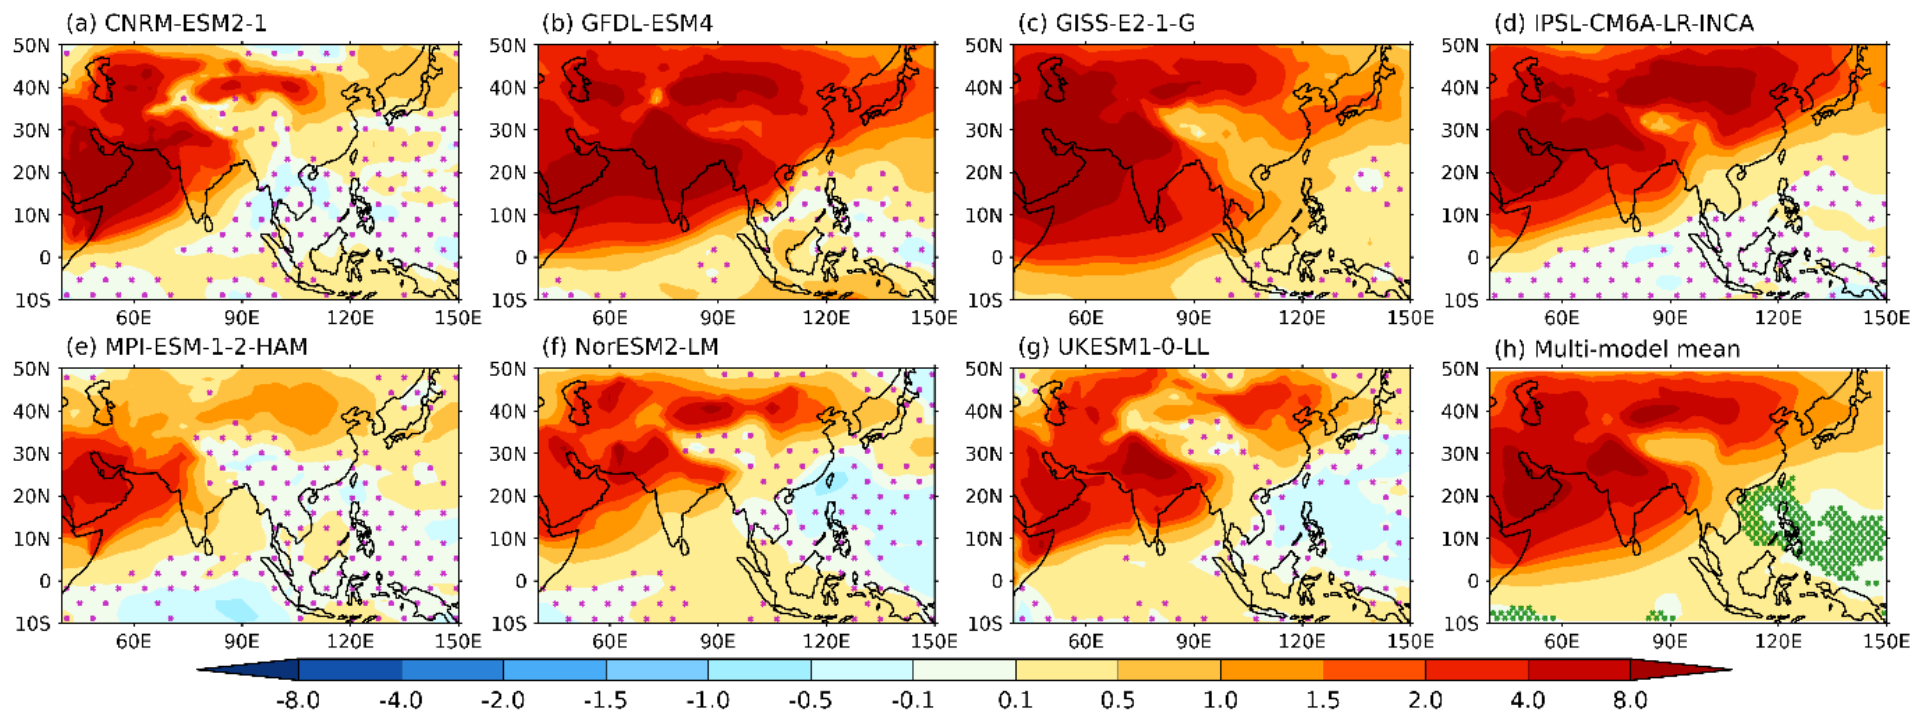

**Figure S19** JJA mean changes in SW clear-sky atmospheric absorption ( $W m^{-2}$ ) due to doubled dust emissions in (a-g) individual models and (h) the multi-model mean. Purple hatches denote insignificant differences at the 10% level. Green hatches in (h) denote where  $\leq 4$  models have the same sign as the multi-model mean.

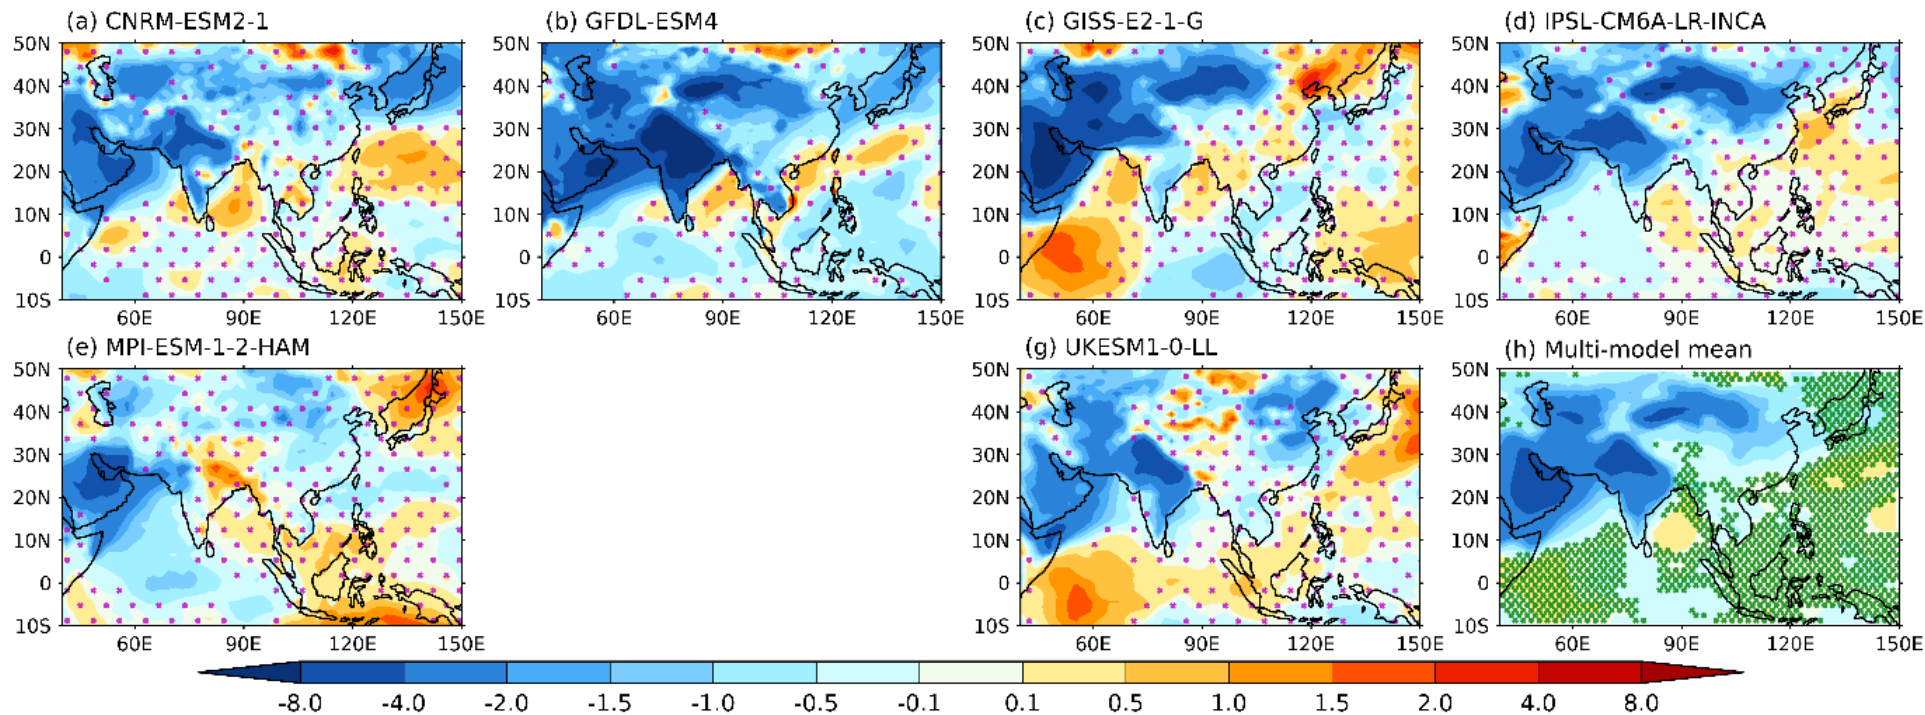

**Figure S20** JJA mean changes in LW clear-sky atmospheric absorption ( $W m^{-2}$ ) due to doubled dust emissions in (a-g) individual models and (h) the multi-model mean. Purple hatches denote insignificant differences at the 10% level. Green hatches in (h) denote where  $\leq 4$  models have the same sign as the multi-model mean.

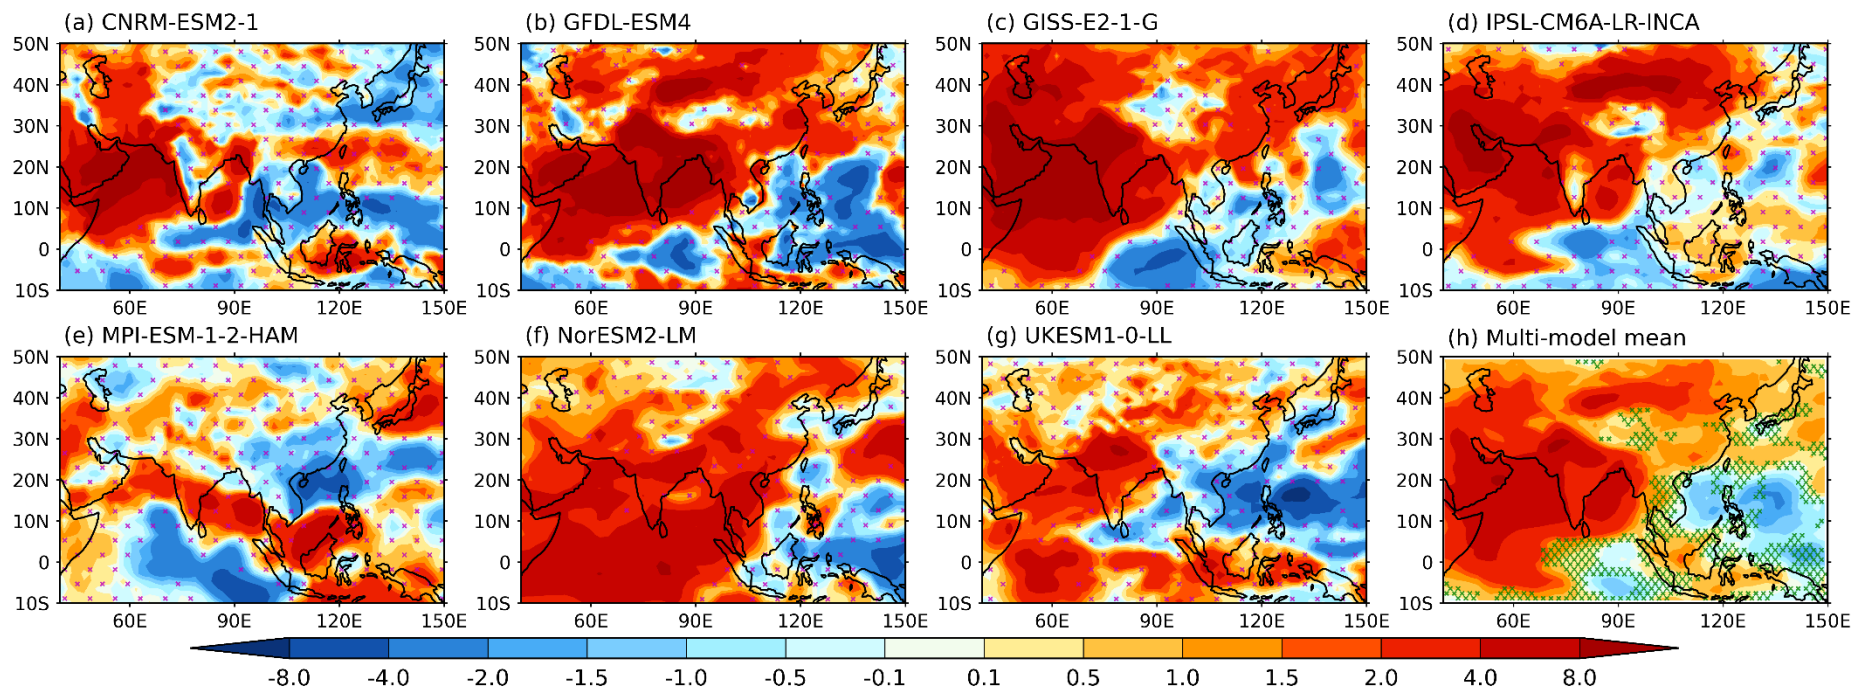

**Figure S21** JJA mean changes in total atmospheric absorption ( $\text{W m}^{-2}$ ) due to doubled dust emissions in (a-g) individual models and (h) the multi-model mean. Purple hatches denote insignificant differences at the 10% level. Green hatches in (h) denote where  $\leq 4$  models have the same sign as the multi-model mean.

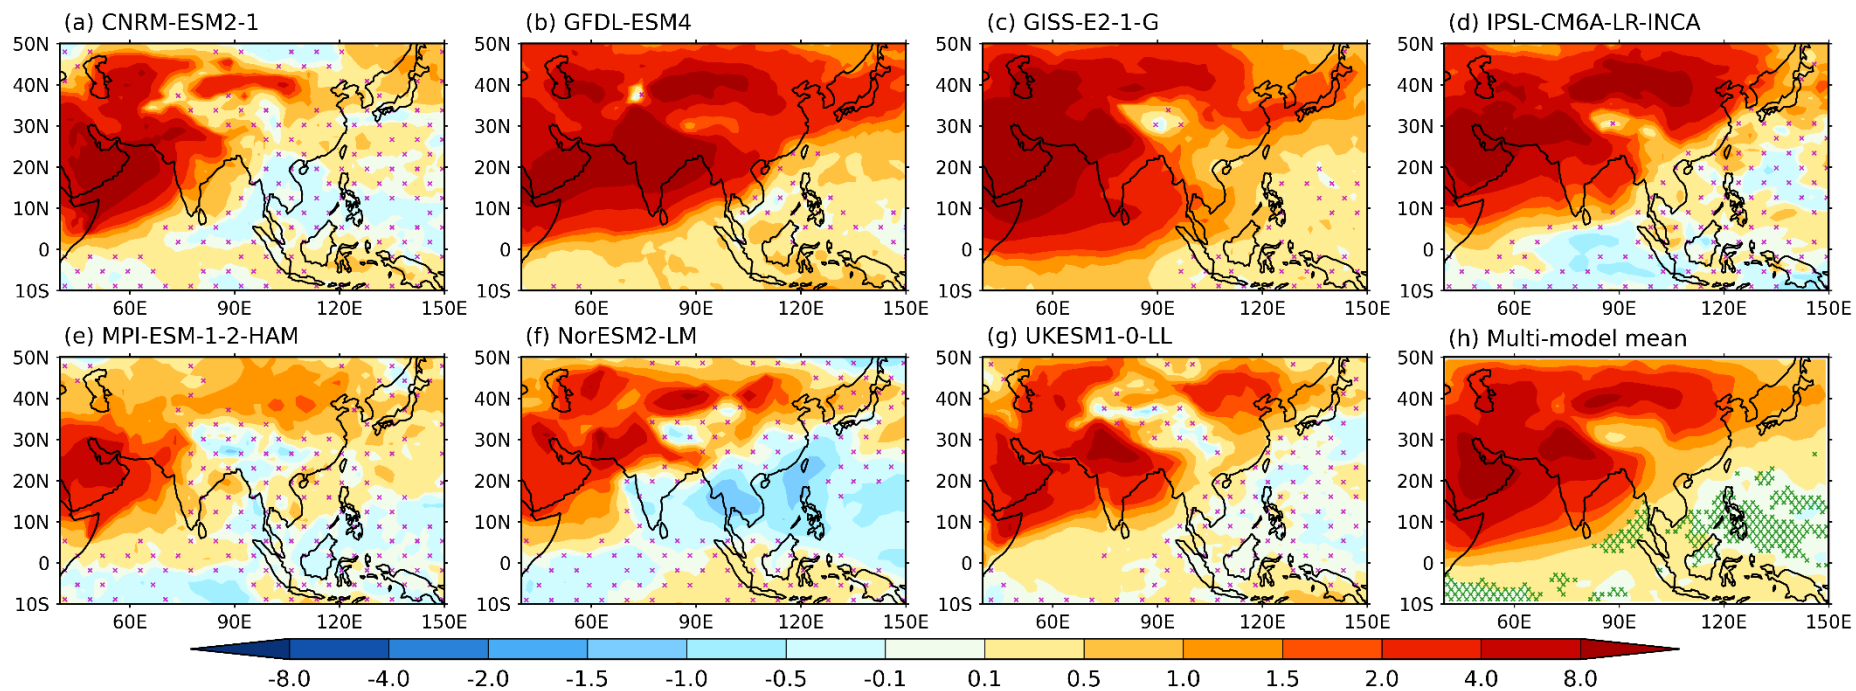

**Figure S22:** JJA mean changes in all-sky SW atmospheric absorption ( $\text{W m}^{-2}$ ) due to doubled dust emissions in (a-g) individual models and (h) the multi-model mean. Purple hatches denote insignificant differences at the 10% level. Green hatches in (h) denote where  $\leq 4$  models have the same sign as the multi-model mean.

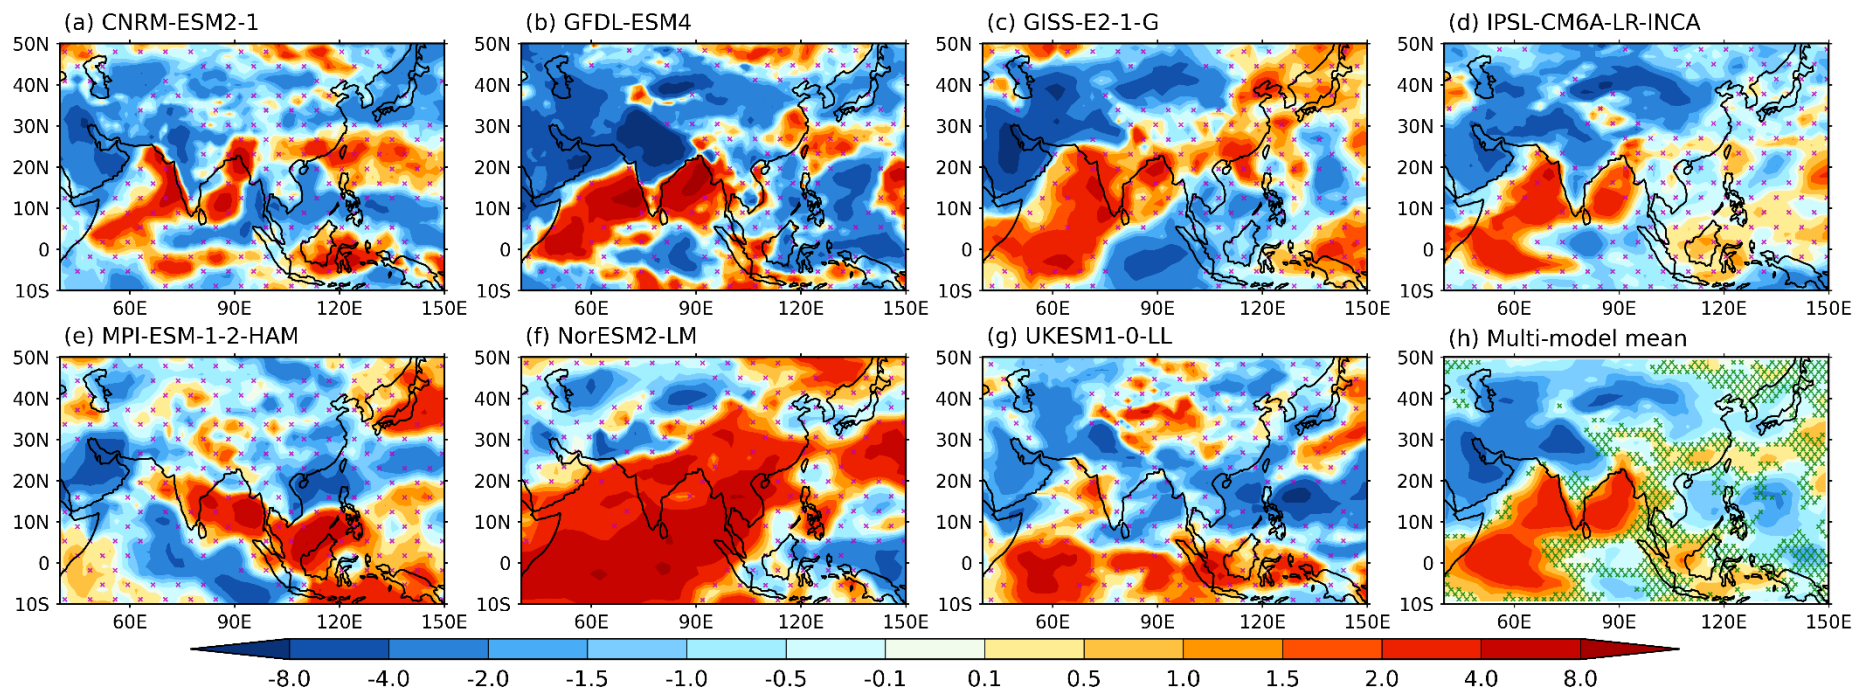

**Figure S23:** JJA mean changes in all-sky LW atmospheric absorption ( $W m^{-2}$ ) due to doubled dust emissions in (a-g) individual models and (h) the multi-model mean. Purple hatches denote insignificant differences at the 10% level. Green hatches in (h) denote where  $\leq 4$  models have the same sign as the multi-model mean.



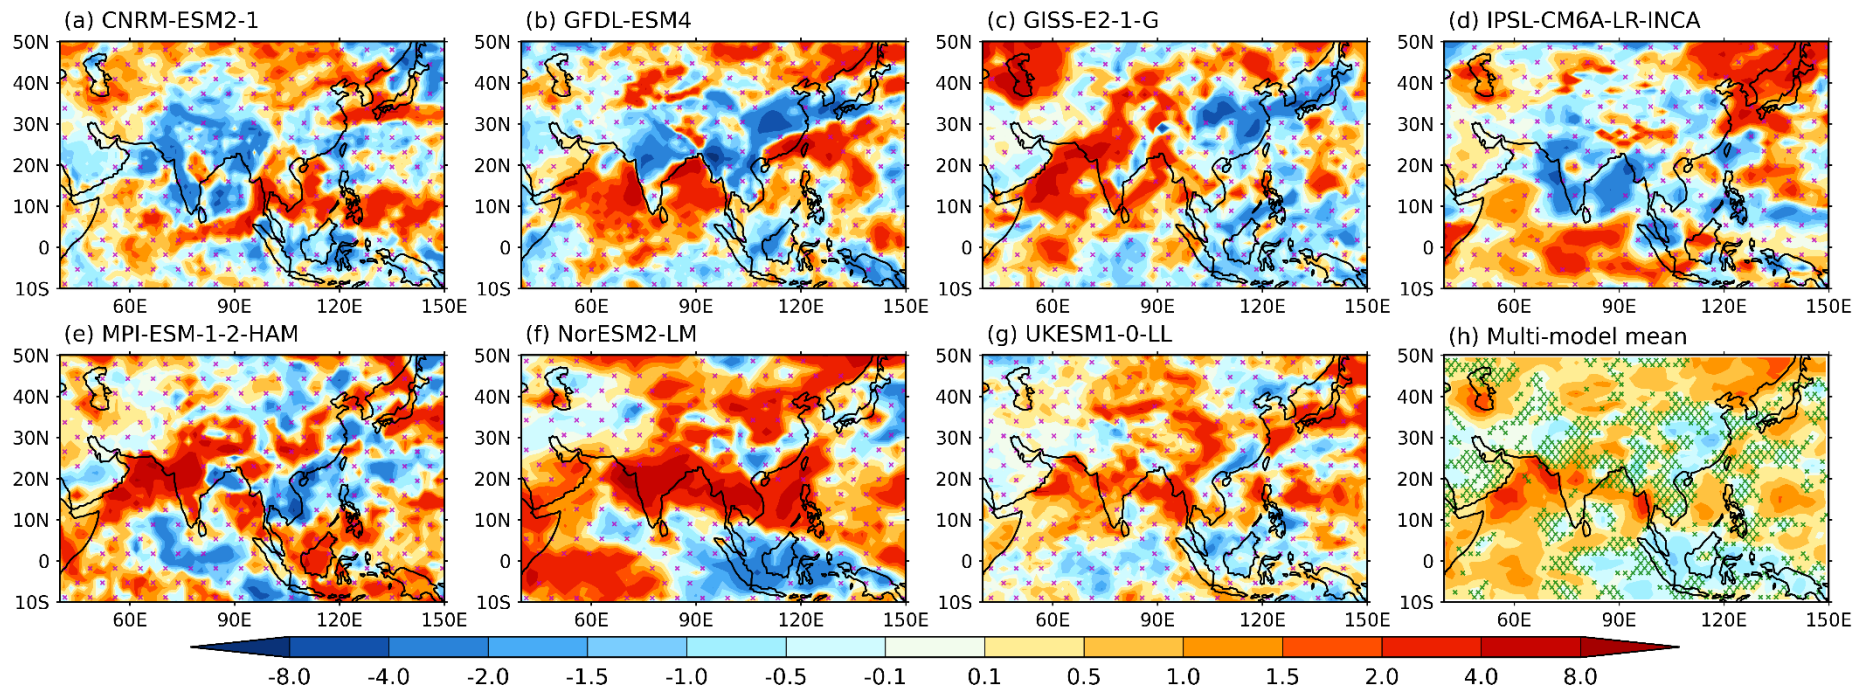

**Figure S24:** JJA mean TOA total (SW+LW) cloud radiative effect ( $W m^{-2}$ ) due to doubled dust emissions in (a-g) individual models and (h) the multi-model mean. Purple hatches denote insignificant differences at the 10% level. Green hatches in (h) denote where  $\leq 4$  models have the same sign as the multi-model mean.

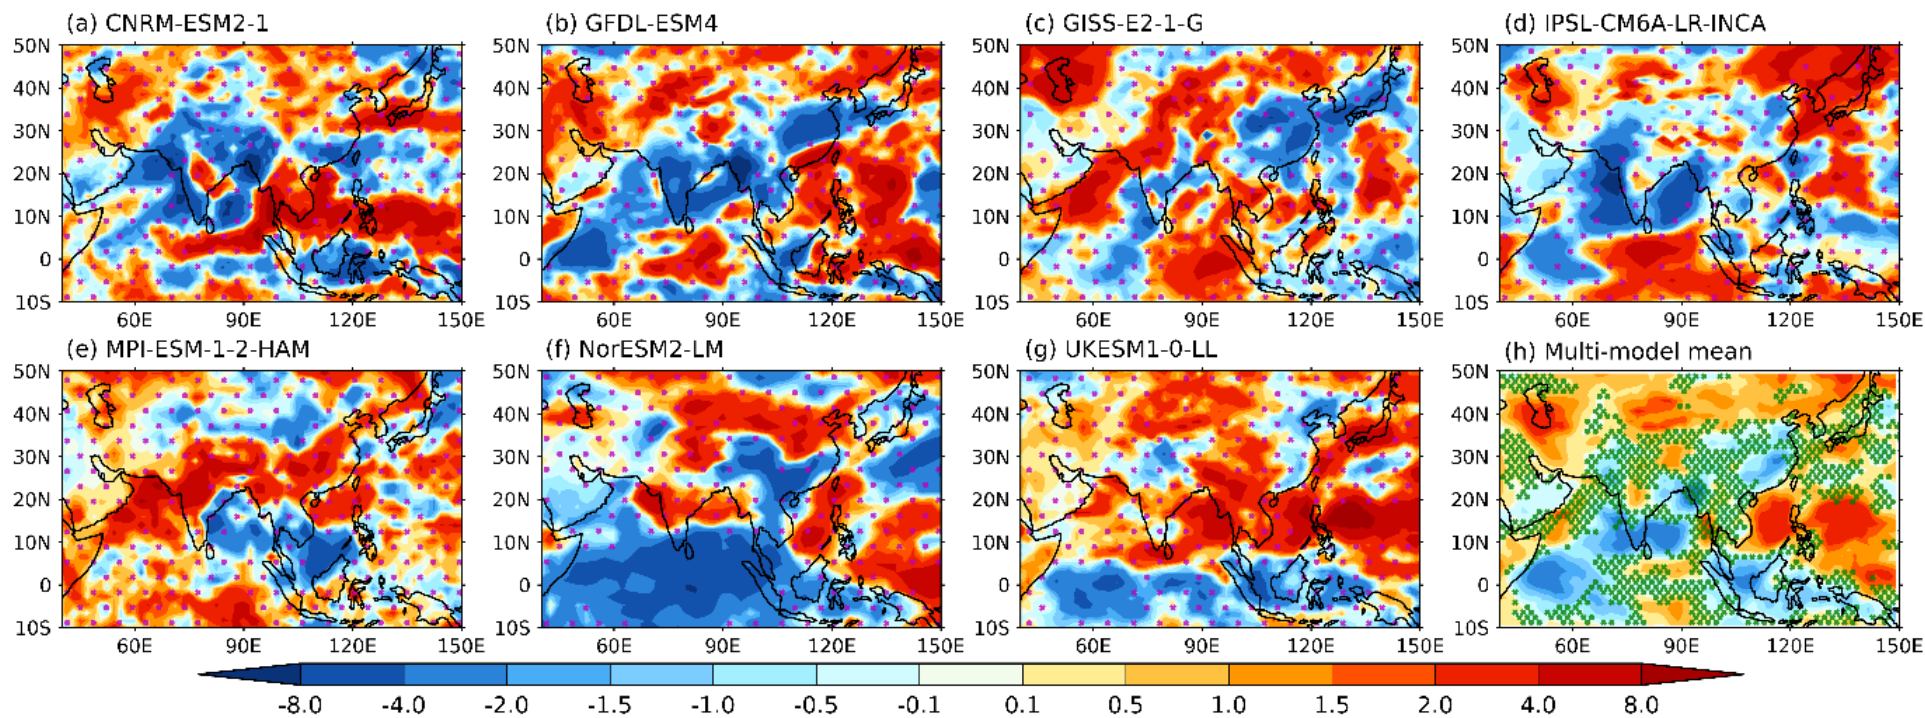

**Figure S25:** JJA mean TOA SW cloud radiative effect ( $\text{W m}^{-2}$ ) due to doubled dust emissions in (a-g) individual models and (h) the multi-model mean. Purple hatches denote insignificant differences at the 10% level. Green hatches in (h) denote where  $\leq 4$  models have the same sign as the multi-model mean.

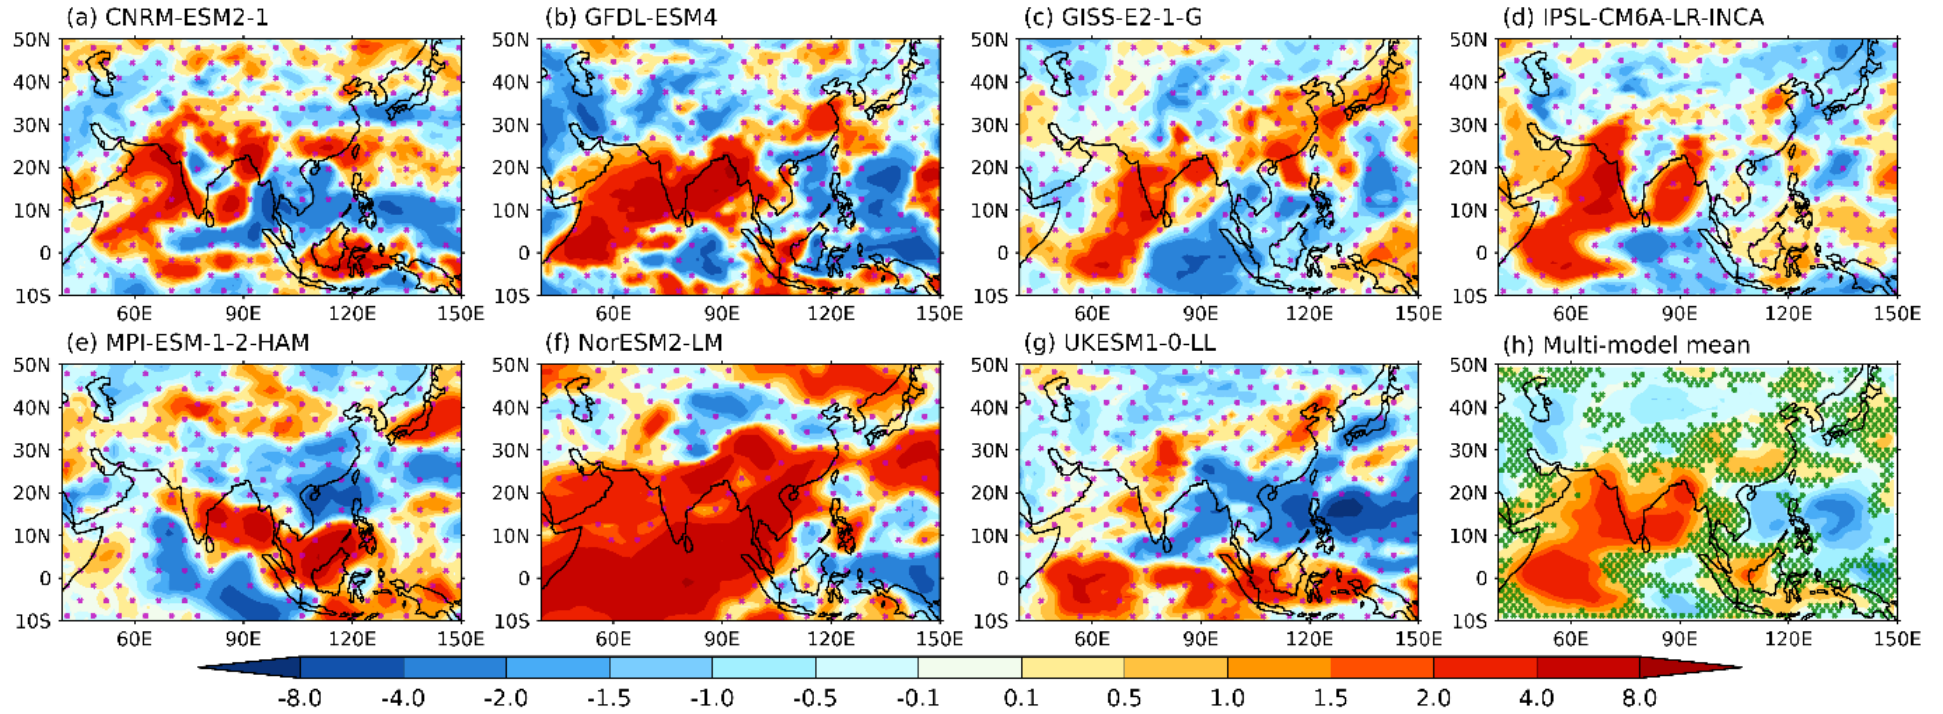

**Figure S26:** JJA mean TOA LW cloud radiative effect ( $W m^{-2}$ ) due to doubled dust emissions in (a-g) individual models and (h) the multi-model mean. Purple hatches denote insignificant differences at the 10% level. Green hatches in (h) denote where  $\leq 4$  models have the same sign as the multi-model mean.

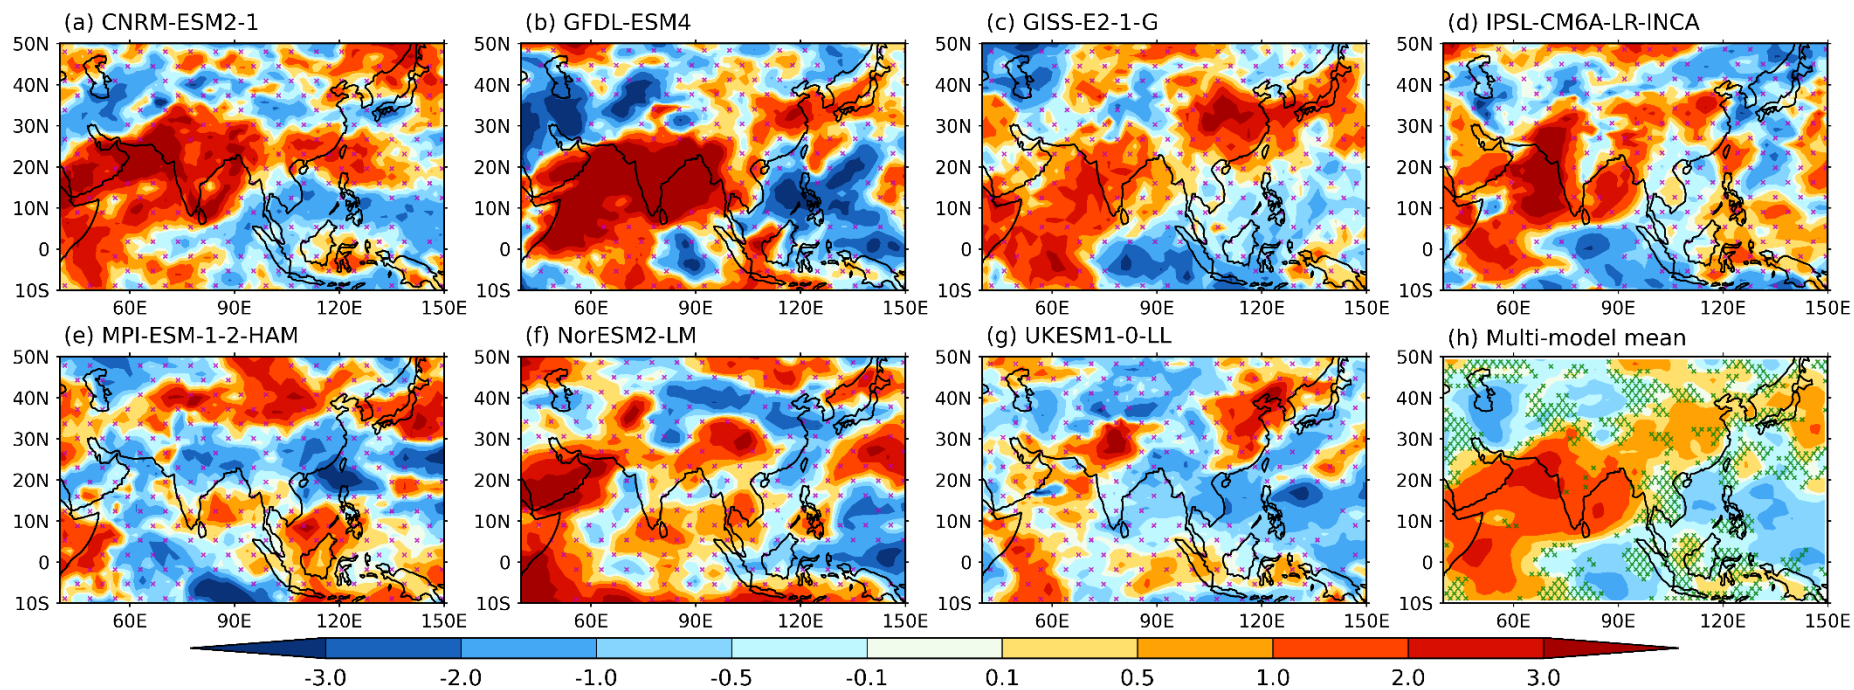

**Figure S27.** JJA mean changes in total cloud fraction (%) due to doubled dust emissions in (a-g) individual models and (h) the multi-model mean. Purple hatches denote insignificant differences at the 10% level. Green hatches in (h) denote where  $\leq 4$  models have the same sign as the multi-model mean.

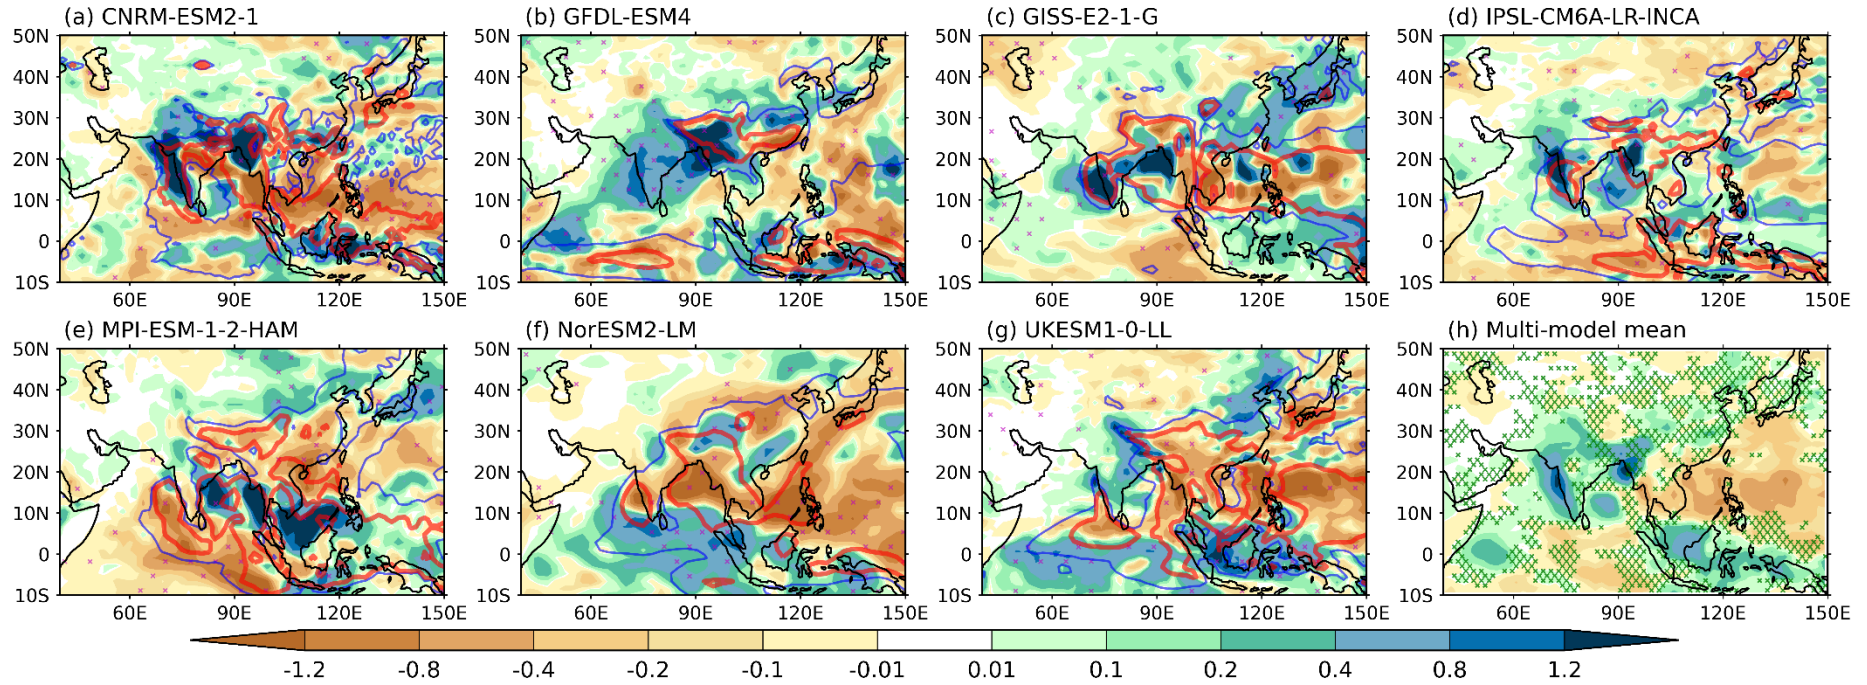

**Figure S28.** JJA mean changes in vertically integrated moisture flux convergence ( $\text{mm day}^{-1}$ ) due to doubled dust emissions in (a-g) individual models and (h) the multi-model mean. Green hatches in (h) denote where  $\leq 4$  models have the same sign as the multi-model mean.

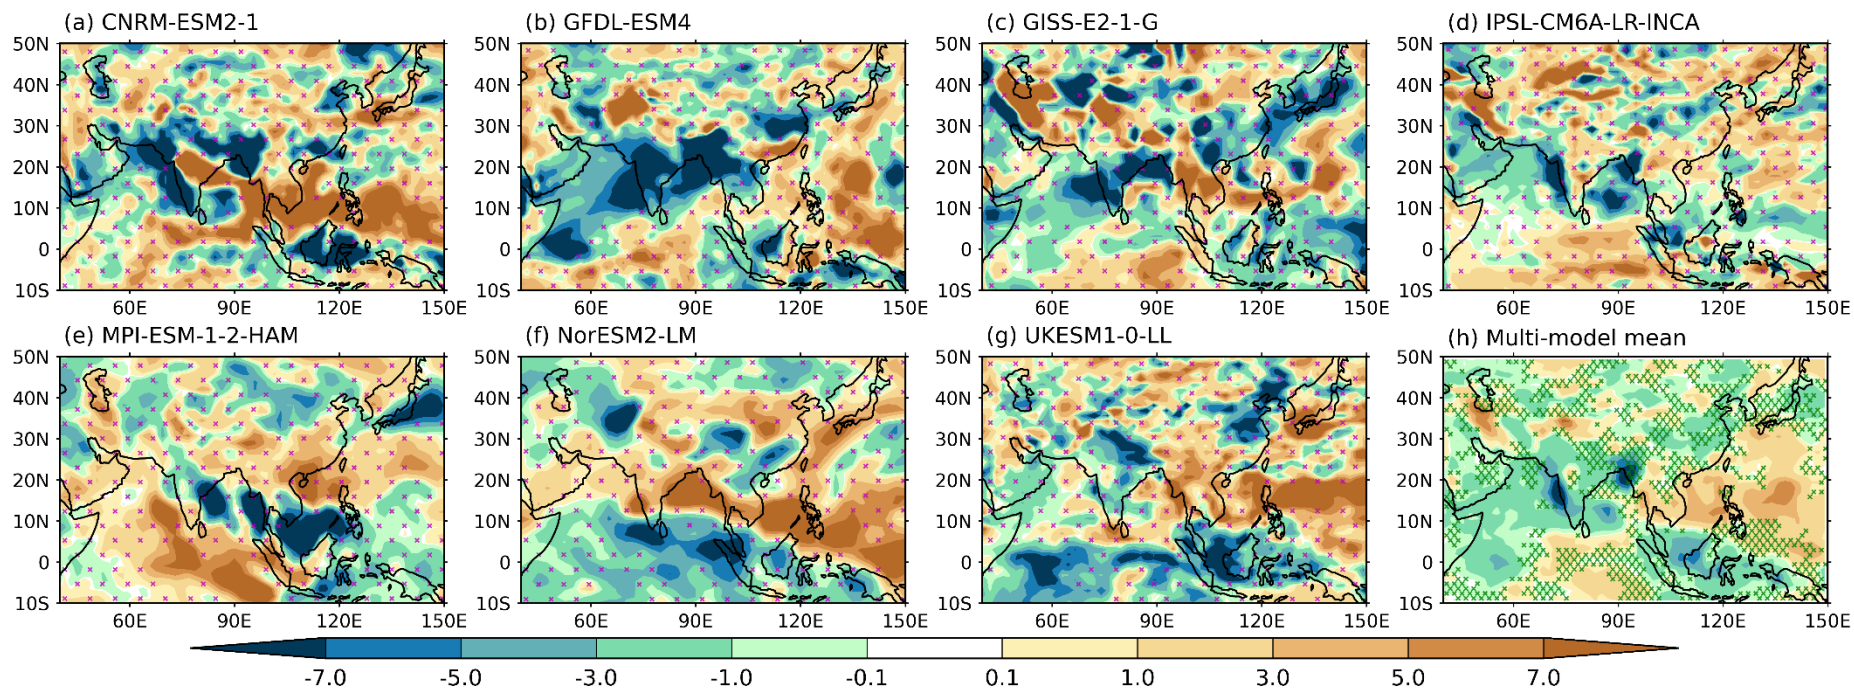

**Figure S29.** JJA mean changes in 500-hPa vertical velocity ( $\text{hPa day}^{-1}$ ) due to doubled dust emissions in (a-g) individual models and (h) the multi-model mean. Purple hatches denote insignificant differences at the 10% level. Green hatches in (h) denote where  $\leq 4$  models have the same sign as the multi-model mean.

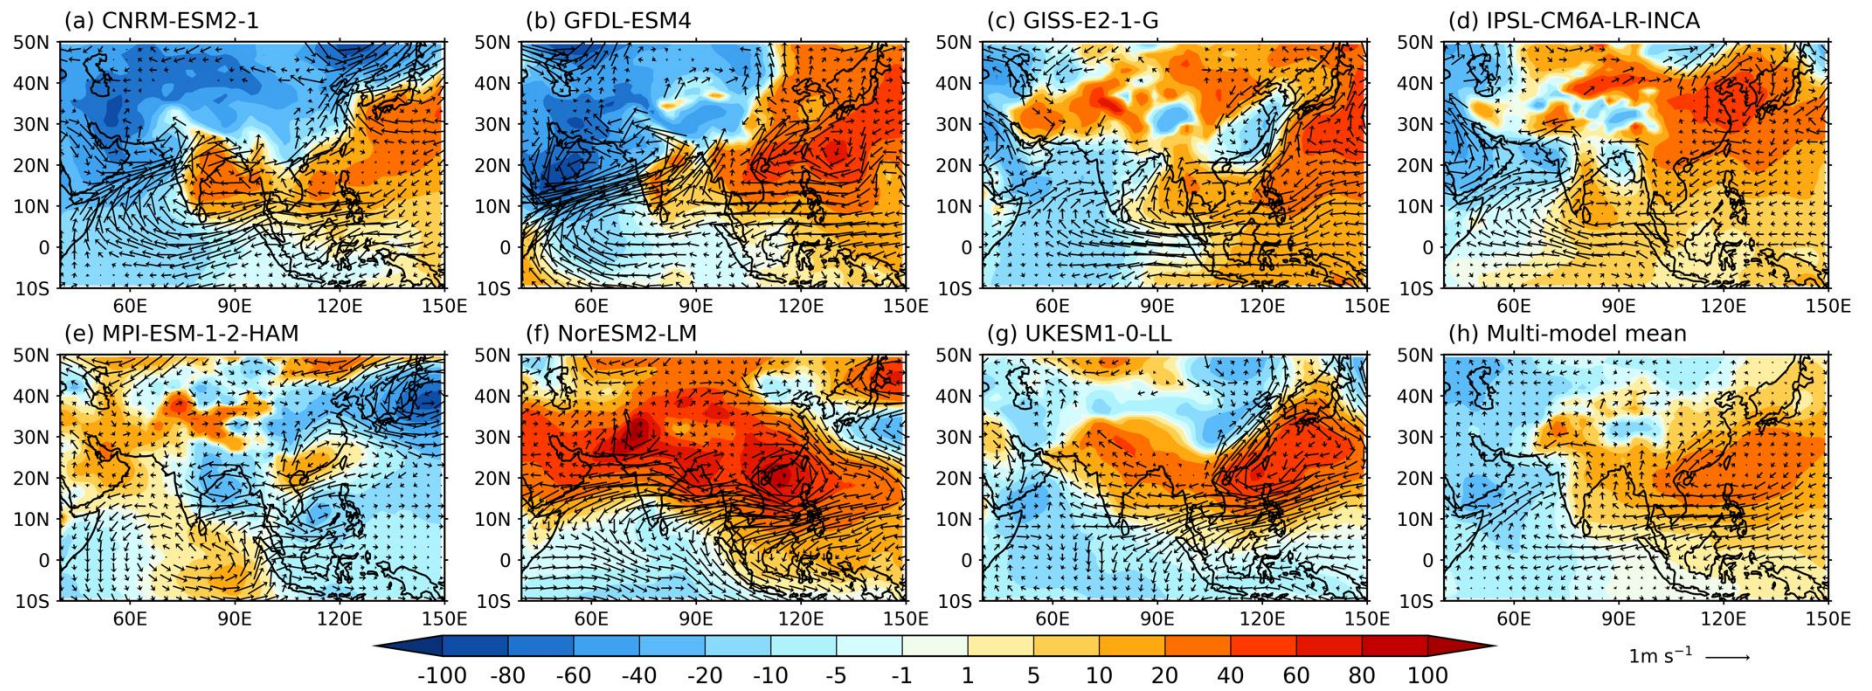

**Figure S30.** JJA mean changes in sea level pressure (colours, Pa) and in 850-hPa winds (vectors,  $\text{m s}^{-1}$ ) due to doubled dust emissions in (a-g) individual models and (h) the multi-model mean.

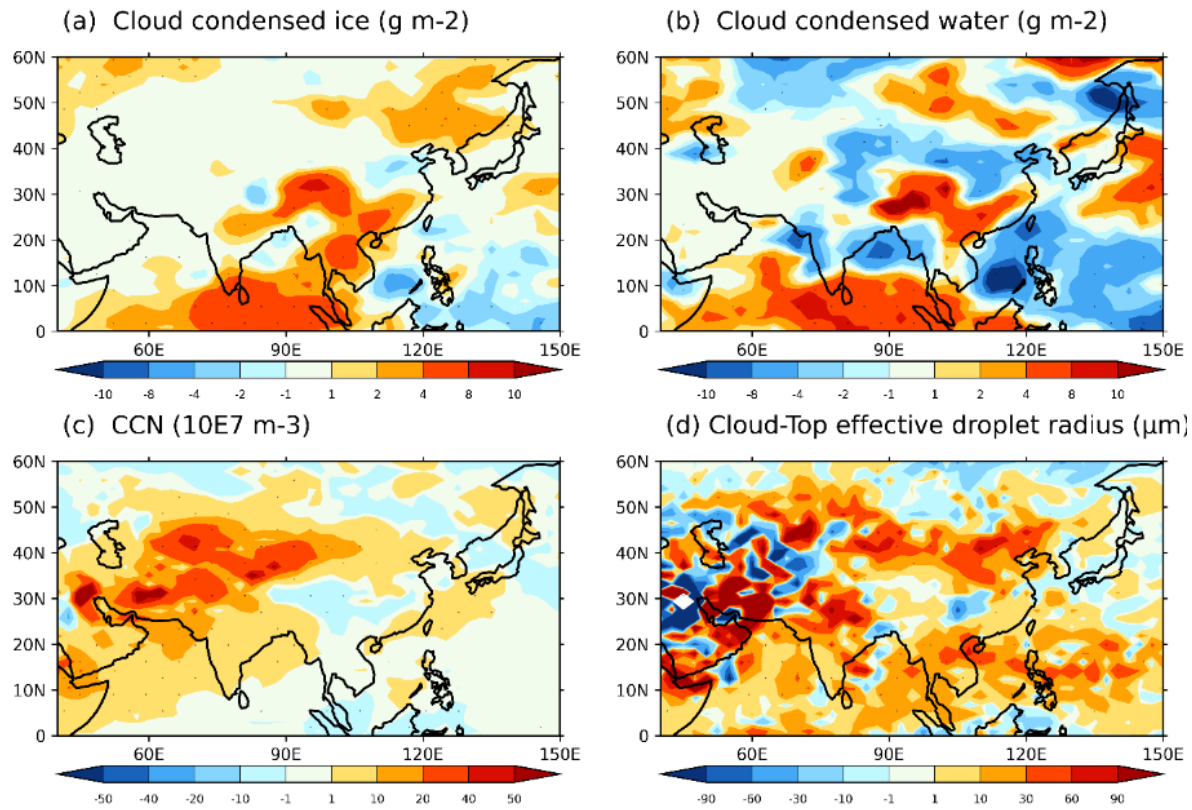

**Figure S31:** NorESM-LM changes in cloud microphysical properties due to doubled dust emissions. Hatches indicate locations where changes are significant.
